1     **Requirement for specific bacterial genome maintenance pathways in repair**  
2     **of C8-linked pyrrolobenzodiazepine (PBD) bi-aryl monomer-mediated DNA**  
3                                     **damage**

4  
5  
6     Asha Mary Joseph<sup>1</sup>, Kazi Nahar<sup>2</sup>, Saheli Daw<sup>1</sup>, Md. Mahbub Hasan<sup>2</sup>, Rebecca Lo<sup>3†</sup>, Tung B. K.  
7     Le<sup>3</sup>, Khondaker Miraz Rahman<sup>2</sup> and Anjana Badrinarayanan<sup>1</sup>

8     <sup>1</sup>National Centre for Biological Sciences (Tata Institute of Fundamental Research), Bangalore, India

9     <sup>2</sup> School of Cancer & Pharmaceutical Sciences, Faculty of Life Sciences & Medicine, King's College  
10     London, Franklin-Wilkins Building, 150 Stamford Street, London, SE1 9NH, UK.

11     <sup>3</sup> John Innes Centre, Department of Molecular Microbiology, Colney Lane, Norwich, NR4 7UH, UK.

12     <sup>†</sup>Current address: University Hospitals of Leicester, Leicester Royal Infirmary, Chemical Pathology,  
13     Leicester, LE1 5WW, UK

14     \*correspondence to [k.miraz.rahman@kcl.ac.uk](mailto:k.miraz.rahman@kcl.ac.uk), [anjana@ncbs.res.in](mailto:anjana@ncbs.res.in)

15

16

17

18

19

20     **Keywords**

21     *Caulobacter crescentus*, DNA repair, Pyrrolobenzodiazepine, C8-linked PBD bi-aryl monomer,  
22     antibiotics, DNA lesion, DNA damage

23

24

25

26

27 **Abstract**

28 Pyrrolobenzodiazepines (PBDs) are naturally occurring DNA binding compounds that possess  
29 anti-tumor and anti-bacterial activity. Chemical modifications of PBDs can result in improved  
30 DNA binding, sequence specificity and enhanced efficacy. More recently, synthetic PBD  
31 monomers have shown promise as payloads for antibody drug conjugates and antibacterial  
32 agents. The precise mechanism of action of these PBD monomers and their role in causing  
33 DNA damage remains to be elucidated. Here we characterized the damage-inducing potential  
34 of two C8-linked PBD bi-aryl monomers in *Caulobacter crescentus* and investigated the  
35 strategies employed by cells to repair the same. We show that these compounds cause DNA  
36 damage and efficiently kill bacteria, in a manner comparable to the extensively used DNA  
37 cross-linking agent mitomycin-C (MMC). However, in stark contrast to MMC which employs a  
38 mutagenic lesion tolerance pathway, we implicate essential functions for error-free  
39 mechanisms in repairing PBD monomer-mediated damage. We find that survival is severely  
40 compromised in cells lacking nucleotide excision repair and to a lesser extent, in cells with  
41 impaired recombination-based repair. Loss of nucleotide excision repair leads to significant  
42 increase in double-strand breaks, underscoring the critical role of this pathway in mediating  
43 repair of PBD-induced DNA lesions. Together, our study provides comprehensive insights into  
44 how mono-alkylating DNA-targeting therapeutic compounds like PBD monomers challenge  
45 cell growth, and identifies the specific mechanisms employed by the cell to counter the same.

46

47

## 48 Introduction

49 Persistent DNA damage can be problematic to cells across domains of life, from unicellular  
50 bacteria to multicellular eukaryotes. It can have deleterious effects on basic cellular processes  
51 as well as organismal functions, and subsequently lead to cell death (Surova & Zhivotovsky,  
52 2013). However, when designed and used appropriately, DNA damage can also work as tools  
53 to eliminate hazardous microorganisms or malignant tissues (de Almeida et al., 2021).

54 DNA damage can be mediated by endogenous or exogenous agents, leading to broad  
55 spectrum of DNA modifications (Chatterjee & Walker, 2017). For example,  
56 methylmethanesulfonate (MMS) leads to methylation on a single base (G, A or C) causing  
57 mono-alkylated adducts such as 7-MeG, 1-MeA and 3-MeC (Beranek, 1990). UV exposure  
58 induces covalent linkages between adjacent pyrimidines, creating intra-strand crosslinks  
59 including cyclobutane pyrimidine dimers (CPDs) and pyrimidine-(6-4)-pyrimidone  
60 photoproducts (Chatterjee & Walker, 2017). On the contrary, mitomycin-C (MMC) causes  
61 inter-strand crosslinks in addition to mono-alkylated adducts and intra-strand crosslinks  
62 (Bargonetti et al., 2010; Tomasz, 1995).

63 Pyrrolobenzodiazepines (PBDs) are a group of DNA damaging agents that bind to the minor  
64 groove of DNA and alkylate DNA in a sequence-specific manner (Gerratana, 2012; Mantaj et  
65 al., 2017). PBDs typically contain an aromatic A-ring, a diazepine B-ring and a pyrrolidone C-  
66 ring, a structure that fits into the minor groove of DNA. Once secured within the minor groove,  
67 an electrophilic imine moiety in the B-ring establishes a covalent link with the C2-NH<sub>2</sub> group  
68 of guanine base on the DNA, preferably within Pu-G-Pu sequences. Several PBDs including  
69 anthramycin, tomaymycin and sibiromycin, naturally produced by actinomycetes are mono-  
70 alkylators of DNA and exhibit strong anti-microbial and anti-tumor properties (Gerratana,  
71 2012; Hurley, 1977; Leimgruber et al., 1965)

72 Diversity in PBDs can be typically brought about by the variations in the A- and C-rings (Mantaj  
73 et al., 2017). For instance, the A ring can be functionalized with electron-donating sidechains  
74 at the C7- and C8-positions resulting in increased alkylating potential and DNA binding  
75 capability of PBDs (Mantaj et al., 2017; Thurston et al., 1999). Research in the last three  
76 decades has led to development of several synthetic PBDs by engineering modifications to

77 the basic PBD structure resulting in enhanced sequence specificity, stability and functionality  
78 (Bose et al., 1992; Gregson et al., 2001; Mantaj et al., 2017; Rahman et al., 2012).

79 Of these, synthetic PBD dimers formed by linking two PBD monomers via their aromatic A-  
80 ring has the potential to form cross-links on DNA, similar to cross-links formed by mitomycin  
81 C (MMC) and have been extensively studied for their chemotherapeutic value (Kung  
82 Sutherland et al., 2013; Puzanov et al., 2011; Rahman et al., 2011). Few of these dimers are  
83 being evaluated as payloads for antibody drug conjugates (ADCs) in clinical trials to specifically  
84 target and kill tumor cells (Kung Sutherland et al., 2013; Morgensztern et al., 2019). However,  
85 there have been a number of failures in the clinical development of PBD-dimer containing  
86 ADCs due to their toxicity (Jackson et al., 2018). This has resulted in significant interest in PBD-  
87 pseudodimer containing only one N10-C11 imine group, PBD-monomers and structurally  
88 related pyridinobenzodiazepines (PDD) monomers (Hoffmann et al., 2020; Kovtun et al.,  
89 2018), which are considered less toxic as they can only mono-alkylate DNA. C8-linked PBD bi-  
90 aryl monomers are a group of synthetic PBD monomers where a heteroaromatic group like  
91 pyrrole or imidazole is directly linked to a phenyl group using C-C coupling or fused with a  
92 phenyl ring and these bi-aryl units are attached to the C8 position of the PBD A-ring. These  
93 PBD monomers exhibit a strong preference for GC-rich DNA, leading to formation of mono-  
94 alkylated adducts on guanine. One such monomer, KMR-28-39 has shown low nanomolar to  
95 picomolar *in vitro* cytotoxicity against a panel of cancer cell lines and *in vivo* anti-tumor  
96 activity to breast cancer and pancreatic cancer xenografts in mouse models (Rahman et al.,  
97 2013). Interestingly, many of these PBD monomers also exhibited anti-bacterial activity  
98 against a range of Gram-positive bacteria, including methicillin-resistant *Staphylococcus*  
99 (Rahman et al., 2012). Another set of PBDs containing a terminal heteroaliphatic ring has  
100 similarly shown excellent activity against a panel of multidrug resistant Gram-negative  
101 bacteria (Picconi et al., 2020), without noticeable toxicity against eukaryotic cells. The  
102 therapeutic potential exhibited by PBD bi-aryl monomers (Andriollo et al., 2018; Brucoli et al.,  
103 2016; Picconi et al., 2020; Rahman et al., 2012; Rosado et al., 2011) is encouraging as they  
104 appear to possess significant anticancer and antibacterial activity and their eukaryotic toxicity  
105 can be tuned by altering the C8-side chain to make them selective against either eukaryotic  
106 or prokaryotic cells.

107 While induction of cross-links and DSBs by PBD dimers (Arnould et al., 2006; Jenkins et al.,  
108 1994) and their repair via endonuclease ERCC1 and homologous recombination (Hartley et  
109 al., 2010; Xing et al., 2019; Zhong et al., 2019) are well characterized, there has been little  
110 research in elucidating the mechanism of action of PBD monomers beyond their ability to  
111 inhibit transcription factors (Corcoran et al., 2019; Kotecha et al., 2008; Rahman et al., 2013).  
112 The contribution of DNA-damage mediated effect on their overall cytotoxicity or antibacterial  
113 activity needs to be studied to properly evaluate their potential as chemotherapeutic agents.  
114 Furthermore, as efforts progress towards developing DNA-interactive PBD monomers as  
115 payloads for antibody drug conjugate, it is also important to elucidate the mechanism(s) that  
116 lead to repair of such PBD lesions, and identify the outcome of their repair on both survival  
117 and mutagenesis.

118 The main objective of this work was to identify the pathways(s) involved in the repair or  
119 tolerance of lesions induced by PBD monomers and assess the possible involvement of error-  
120 prone repair or tolerance mechanisms (such as translesion synthesis) that can impact  
121 damage-induced mutagenesis, contributing to development of resistance. We used the non-  
122 pathogenic Gram-negative bacteria *Caulobacter crescentus* as our model system. Unlike *E.*  
123 *coli*, this GC-rich organism shares several key genome maintenance features, including error-  
124 prone lesion tolerance mechanisms, with pathogenic bacteria such as *Pseudomonas*  
125 *aeruginosa* and *Mycobacterium tuberculosis* (Alves et al., 2017; Boshoff et al., 2003; Galhardo,  
126 2005; Jatsenko et al., 2017; Warner et al., 2010). Using two prototypes (described in Fig. 1A  
127 and below), we found that C8-linked PBD bi-aryl monomers induced DNA damage and  
128 efficiently killed *Caulobacter crescentus*. Repair of these lesions was predominantly mediated  
129 by nucleotide excision repair; lack of repair led to generation of double-strand breaks and  
130 severely compromised survival. In contrast to MMC we found that mutagenic translesion  
131 synthesis was not essential for PBD monomer-mediated damage tolerance or repair. Taken  
132 together, our study uncovers, for the first time, the mechanisms involved in repair of DNA-  
133 monoalkylations induced by PBD monomers and their overall impact on genome integrity and  
134 survival of bacterial cells.

## 135 **Results**

136 **Chemically synthesized C8-linked PBD bi-aryl monomers KMR-28-33 and KMR-28-35 cause**  
137 **DNA damage in *Caulobacter crescentus***

138 To assess the DNA damaging potential of PBD monomers, we chose two C8-linked PBD bi-aryl  
139 monomers (KMR-28-33 and KMR-28-35) (Fig. 1A) as prototypes. These compounds, which  
140 have propensity to bind to DNA (preferentially to GC-rich tracts (Rahman et al., 2013)),  
141 showed strong cytotoxic (Rahman et al., 2013) and antibacterial activity towards Gram-  
142 positive bacteria in the earlier studies (Rahman et al., 2012). As a comparison, we evaluated  
143 the repair of lesions caused by a conventional and well-characterized DNA cross-linking agent  
144 (mitomycin-C, MMC).

145 Indeed, molecular modelling of KMR-28-33 and KMR-28-35 binding to DNA also lent strong  
146 support to the possibility that these PBD monomers could result in DNA lesions, without  
147 distorting the DNA helix itself, as they snugly fit within the DNA minor groove (Fig. 1B, S2A.  
148 S2B). Our *in vitro* FRET-based DNA melting assays corroborated the binding of these PBD  
149 monomers to DNA (Fig. S2C). Given these observations, we investigate whether these PBD  
150 monomers cause DNA damage and if so, what mechanisms are employed by cells to repair  
151 the same. For this, we use the GC-rich model system *Caulobacter crescentus*, where we  
152 deleted genes involved in repair of specific types of DNA damage (Fig. S2E).

153 We first assessed cell survival upon treatment with KMR-28-33 and KMR-28-35 (synthesis  
154 described in Fig. S1A-B) in a wild type background. As a reference, we also exposed cells to  
155 well-characterized DNA damaging agents, that are known to induce specific types of damage  
156 (Fig. 2A and S2D). In particular, we compared the effects of KMR-28-33 and KMR-28-35 to  
157 mitomycin-C (MMC). Both KMR-28-33 and KMR-28-35 can only form DNA monoadducts while  
158 MMC can form intra-strand and inter-strand crosslinks in addition to monoadducts (Rahman  
159 et al., 2012; Warren et al., 1998).

160 We observed that both C8-linked PBD bi-aryl monomers caused cell death in a dose-  
161 dependent manner (Fig. 2A). We next asked whether these PBD monomers resulted in DNA  
162 damage. For this, we measured SOS response induction in wild type *Caulobacter* after  
163 treatment with the KMR-28-33 and KMR-28-35. We specifically quantified the expression of  
164 a fluorescence marker (*YFP*) induced under an SOS promoter ( $P_{sidA}$ ) integrated on the  
165 *Caulobacter* chromosome at the *xyl* locus (Badrinarayanan et al., 2015; Joseph et al., 2021).  
166 We found that exposure of cells to both PBD monomers resulted in significant accumulation  
167 of SOS-induced YFP (comparable to that observed in case of MMC, at concentrations that

168 similarly affected cell growth in all three damages), suggesting that KMR-28-33 and KMR-28-  
169 35 caused DNA damage (Fig. 2B).

### 170 **Requirement for RecA, but not the SOS response, in C8-linked PBD bi-aryl monomer-treated** 171 **cells**

172 Based on the above observations we wondered whether specific pathways under the SOS  
173 response were required to repair KMR-28-33 and KMR-28-35-mediated damage. For  
174 example, in the case of MMC, the error-prone translesion synthesis polymerase, DnaE2, has  
175 been found to be essential (Boshoff et al., 2003; Galhardo, 2005; Joseph et al., 2021). In  
176 support of the possibility that these PBD monomers indeed induce DNA damage, we found  
177 that cells lacking *recA* were compromised for survival upon treatment with both PBD-  
178 monomers (Fig. 3A). The difference in sensitivity for  $\Delta recA$  cells across KMR-28-33, KMR-38-  
179 35 and MMC suggested that there may be distinct repair mechanisms at play. We thus  
180 uncoupled key DNA damage-specific functions of RecA (recombination and SOS induction), to  
181 assess the contribution of the two towards survival. For this, we generated a strain where the  
182 SOS repressor, *lexA*, is deleted. To circumvent the problem of cell length elongation in this  
183 background, previous studies have additionally deleted the SOS-induced division inhibitor,  
184 *sidA* (Modell et al., 2011). In this constitutive ‘SOS-ON’ background, deletion of *recA* would  
185 predominantly eliminate its function in recombination. Thus, this triple deletion of  
186 *lexAsidArecA* can be used as a genetic read-out to test requirement of SOS vs recombination  
187 functions of RecA upon DNA damage treatment.

188 In case of MMC-damage, SOS-ON cells performed better than those deleted for *recA* (Fig. 3A),  
189 suggesting that a pathway regulated under the SOS response contributed significantly to cell  
190 survival under MMC damage. Indeed, this phenotype can be attributed to the expression of  
191 the TLS pathway (including the error-prone polymerase DnaE2) in SOS-ON cells, but not in  
192 cells deleted for *recA*. Previous studies have implicated an important role for this mechanism  
193 in tolerance of MMC-induced lesions, independent of *recA* (Galhardo, 2005; Joseph et al.,  
194 2021) (Fig. 3B). In contrast to MMC, we found that  $\Delta recA$  or  $\Delta lexAsidArecA$  cells were similarly  
195 compromised in growth when treated with the C8-linked PBD bi-aryl monomers, suggesting  
196 that SOS function was not required for combatting KMR-28-33 and KMR-28-35-mediated  
197 damage (Fig. 3A). In line with this observation, we also found that TLS polymerase DnaE2 was  
198 not essential to tolerate C8-linked PBD bi-aryl monomer-mediated damage (Fig. 3B).

199 Given the sensitivity of  $\Delta recA$  cells (independent of SOS) to treatment with the KMR  
200 compounds, we asked whether recombination-mediated repair contributed to cell survival  
201 under PBD monomer-mediated damage. For this we deleted genes involved in specific  
202 recombination-based repair: a. *recF*, *recO* and *recR* that function in single-strand gap (SSG)  
203 repair and b. *addAB* and *recN* that function in double-strand break (DSB) repair (Rocha et al.,  
204 2005; Spies & Kowalczykowski, 2014). It is important to note that although we categorize the  
205 genes in this manner, there is also evidence to suggest that they may have overlapping  
206 functions (Pages, 2003).

207 In case of MMC damage, we found that cells deleted for *recF*, *recO* or *recR* were similarly  
208 sensitive to damage, and comparable with a *recA* deletion (Fig. 4A-B). Given the  $\Delta recA$ -like  
209 sensitivity in these backgrounds, it is tempting to speculate that these proteins may play a  
210 role in loading RecA at ssDNA gaps to enable SOS induction, apart from contribution to  
211 recombination-based repair. In line with this possibility, *addAB* and *recN* deleted cells were  
212 less compromised in growth when compared to the  $\Delta recA$  cells (Fig. 4A). In contrast to MMC  
213 damage, cells treated with KMR-28-33 or KMR-28-35 were similarly compromised in growth  
214 in the absence of SSG or DSB repair (Fig. 4A-B). Importantly, the sensitivity observed in case  
215 of these deletions mirrored that of *recA*, suggesting that both recombination pathways may  
216 contribute to repairing PBD bi-aryl monomer-induced damage.

### 217 **Nucleotide excision repair (NER) is essential for survival under KMR-28-33 and KMR-28-35-** 218 **induced DNA damage**

219 Although we implicated a role for recombination in repair of C8-linked PBD bi-aryl monomer-  
220 mediated damage, these PBD monomers are thought to predominantly form DNA mono-  
221 alkylations and are not known to directly induce double-strand breaks. To estimate the DSB-  
222 inducing potential of KMR-28-33 and KMR-28-35, we adapted the Gam-GFP reporter system  
223 previously described in *E. coli* (Shee et al., 2013) to mark DSB ends *in vivo* in *Caulobacter*.  
224 Using this system, we estimated the percentage of cells with Gam localization in the presence  
225 and absence of the lesion-inducing damaging agents (Fig. S3A). In the absence of any damage,  
226 <1% cells had detectable foci. As anticipated, in the presence of the KMR compounds, this  
227 number increased only nominally to ~5% after 2 h of treatment with the compounds. This was  
228 similar to observations made for MMC-induced damage as well (Fig. S3A). Interestingly loss  
229 of *recN*, required for recombination repair, only resulted in a modest increase in DSBs under



230 KMR compounds or MMC (Fig. S3A). Together, this suggested to us that recombination may  
231 only be a minor repair pathway, with some other mechanism(s) likely enabling lesion repair  
232 or tolerance.

233 We thus wondered which lesion repair or tolerance pathways were required to repair damage  
234 induced by the C8-linked PBD bi-aryl monomers. As shown earlier, unlike MMC, we had ruled  
235 out a role for TLS polymerase DnaE2 (Fig. 3A-3B). Indeed, the lack of SOS response essentiality  
236 also eliminated a role for the other TLS polymerase, DinB (Galhardo, 2005; Joseph &  
237 Badrinarayanan, 2020), in this case (Fig. 3A). We next assessed survival in cells compromised  
238 for alkylation repair (*alkB*) (Colombi & Gomes, 1997) or mismatch repair (*mutL*) (Chai et al.,  
239 2021) and found that these pathways also did not contribute to repair of KMR-induced  
240 damage (Fig. S3B).

241 We thus turned to Nucleotide Excision Repair (NER). NER is an important mechanism of DNA  
242 lesion repair, that predominantly acts on helix-distorting lesions (Jia et al., 2009; Liu et al.,  
243 2011). Although damage induced by these PBD monomers is thought to not cause significant  
244 distortion to the DNA helix, we found that cells lacking *uvrA* (the lesion scanning component  
245 of the NER pathway) were severely compromised in survival under KMR-28-33 or KMR-28-35  
246 damage (Fig. 5A). This was in contrast to MMC, where UvrA is required but not as essential,  
247 as seen in case of the C8-linked PBD bi-aryl monomers (Fig. 5A). Indeed, differential sensitivity  
248 of  $\Delta uv r A$  strains to UV, MMS and norfloxacin damage further underscored the specificity of  
249 this repair pathway (Fig. S4A).

250 NER primarily functions via two ways: transcription-coupled repair (TCR) and global genomic  
251 repair (GGR). In case of TCR, Mfd plays a central role in recruiting Uvr components to the site  
252 of lesion for excision, followed by gap filling (C. Selby & Sancar, 1993; Strick & Portman, 2019).  
253 On the other hand, in case of GGR, UvrA is thought to scan and recognize lesions across the  
254 genome, and subsequently initiate repair (Kisker et al., 2013). We thus deleted the *mfd*  
255 homolog in *Caulobacter* and found that cells lacking the ability to engage in TCR were not as  
256 severely compromised in survival, when compared to  $\Delta uv r A$  deleted cells (Fig. S4B). These  
257 data suggest that the GGR arm of NER is primarily responsible for repair of DNA lesions  
258 induced by KMR-28-33 and KMR-28-35. Indeed, alternate pathways for repair coupled to  
259 transcription, independent of Mfd, have also been proposed (C. P. Selby, 2017). We have not

260 investigated the role of such mechanisms, which are currently not well-characterized or  
261 identified in *Caulobacter*.

262 Importantly, the absence of NER resulted in severe genome instability in cells treated with  
263 KMR-28-33 or KMR-28-35. As shown above, only 5-6% wild type cells treated with KMR  
264 compounds or with MMC had Gam localizations, indicating DSBs. In contrast, the lack of *uvrA*  
265 resulted in a significant increase in cells with Gam localizations in case of the PBD monomers,  
266 with 56% cells having DSBs upon KMR-28-33 treatment and 40% cells with DSBs on KMR-28-  
267 35 treatment (Fig. 5B). This was not found to be the case for MMC-treated cells, where *uvrA*  
268 deletion only led to modest increase in percentage cells with DSBs (6% in wild type to 10% in  
269 NER-compromised cells) (Fig. 5B). Such marked genome instability was observed only when  
270 NER action was compromised, as deletion of *recN* did not result in increase in localization of  
271 Gam-GFP (Fig. S3A).

272 Together these results highlight: a. the essentiality of NER in repairing C8-linked PBD bi-aryl  
273 monomer-mediated damage and b. the distinct mechanisms of DNA damage repair in case of  
274 the PBD monomers, when compared to an extensively studied DNA cross-linking agent, MMC  
275 (Fig. S5).

## 276 **Discussion**

277 Earlier studies have affirmed the specificity of action of pathways for repair of DNA damage.  
278 For example, MrfA and MrfB in *Bacillus subtilis*, and MmcA and MmcB in *Caulobacter*  
279 *crescentus* are essential for repair of only MMC-induced lesions (Burby & Simmons, 2019;  
280 Lopes-Kulishev et al., 2015). Similarly, NER has been implicated as the primary repair pathway  
281 in case of nitrofurazone damage in *E. coli* (Ona et al., 2009). In many instances, the  
282 requirement for different repair components is likely driven the structural variations in lesions  
283 induced by specific damaging agents (Cole et al., 2018; Ona et al., 2009; Williams et al., 2013).  
284 Such difference in function can be observed even within a pathway, when the type of lesion  
285 differs. Both prokaryotic and eukaryotic TLS polymerases exhibit substrate specificity which  
286 defines their lesion bypass properties including efficiency of bypass and fidelity (Inomata et  
287 al., 2021; Ippoliti et al., 2012; Prakash et al., 2005; Waters et al., 2009). In case of *Caulobacter*,  
288 requirement for TLS polymerase DnaE2 is relatively higher for repair of MMC lesions than UV  
289 lesions (Galhardo, 2005; Joseph et al., 2021).

290 Harnessing this specificity in function of repair pathways, in this study, we determined the  
291 damage-inducing potential of two C8-linked PBD bi-aryl monomers and delineated the  
292 strategies employed by bacterial cells to repair the same. Our results indicate that base  
293 modifications (in the form of mono-alkylated adducts) caused by the KMR compounds are  
294 predominantly repaired by NER and do not employ error-prone TLS mechanisms. Indeed, it is  
295 tempting to attribute the difference between MMC and the KMR compounds to repair/  
296 tolerance of monoalkylations vs inter and intra-strand DNA crosslinks. While the C8-linked  
297 PBD bi-aryl monomers can only form mono-adducts, MMC treatment can result in mono-  
298 adducts as well as both inter and intra-strand DNA crosslinks. Thus, the relative contribution  
299 of various repair components could differ between lesions that are structurally and chemically  
300 distinct, but mechanistically similar.

301 In addition to NER, we find contribution of recombination-mediated repair to cell survival in  
302 case of the KMR compounds. The exact sequence of event(s) that lead to conversion of a  
303 mono-adduct into a DSB remains elusive. It is speculated that cellular processes like  
304 transcription, replication and even incomplete repair can lead to generation of single  
305 stranded gaps as well as double stranded breaks (Aguilera & Gaillard, 2014; Mehta & Haber,  
306 2014). The observation that the NER mutant is far more compromised in survival and  
307 generates much higher proportion of DSBs than a recombination mutant supports the idea  
308 that recombination may act secondary to lesion repair via NER. Indeed, we did consider  
309 making a strain impaired in both NER and recombination to test this possibility. However, the  
310 very high sensitivity of the *ΔuvrA* strain to KMR compounds precludes our ability to do so with  
311 reliability. Future work aimed at quantitative estimation of the levels and types of DNA  
312 damage induced *in vivo* in all three cases (KMR compounds and MMC) will enable us to further  
313 discern the hierarchy of requirement and action of repair pathways.

314 In sum, our work highlights the importance of studying the mechanism of action of potential  
315 DNA-interactive therapeutics like PBD monomers in depth, to understand how they may  
316 affect cell growth and what strategies may be employed by the cell to respond to the same.  
317 For example, when considering a DNA damaging agent for therapeutic purposes, it is  
318 important to understand the fidelity of repair mechanisms that could be employed by the  
319 cells. Mutagenic repair can be a major source of stress-induced mutagenesis and subsequent  
320 development of resistance (Fitzgerald et al., 2017; Ippoliti et al., 2012; Joseph &

321 Badrinarayanan, 2020). Our findings suggest that C8-linked PBD bi-aryl monomer-induced  
322 lesions are likely non-mutagenic, and are predominantly repaired by nucleotide excision  
323 repair, thus negating an important driver for development of chemoresistance and  
324 antimicrobial resistance. This contrasts with PBD dimers which are known to cause  
325 mutagenesis and non-selective toxicity, and makes the case for using PBD monomers as ADC  
326 payloads to overcome recent clinical failures observed with PBD dimers (Jackson et al., 2018).  
327 Identifying the dependency on NER (specifically Uvr components, which are restricted to  
328 bacteria) further opens up possibilities for considering inhibitors for Uvr components to use  
329 in combination with the PBD monomers. Indeed, chemical inhibitors for specific repair  
330 pathways have been identified previously, including for *E. coli* RecBCD, *H. pylori* AddAB and  
331 *M. smegmatis* Uvr proteins (Amundsen et al., 2012; Mazloum et al., 2011). Combining a DNA  
332 damaging drug with a small molecule inhibitor capable of dampening damage repair in the  
333 pathogen can potentiate the efficacy of the drug and reduce pleotropic cytotoxicity (Lim et  
334 al., 2019).

335

336

## 337 **Materials and methods**

### 338 **Synthesis of KMR-28-33 and KMR-28-35**

339 The PBD component of the hybrids was synthesized from vanillin as previously described in  
340 the literature (Rahman et al., 2013) and is summarized in Fig. S1A. A four-carbon linker was  
341 used to connect the PBD component with the non-covalently interactive subunits, as chains  
342 of this length had proven optimal in previous hybrid SAR studies (Wells et al., 2006). The linker  
343 was located at the C8 position of the molecule to allow an isohelical fit of the non-covalent  
344 component of the hybrid along the minor groove upon covalent PBD binding. After the  
345 synthesis of the PBD core, non-covalently interactive side chains were constructed using  
346 combinations of benzofused (benzothiophene, KMR-28-33), five membered heterocyclic  
347 structures (N-methyl pyrrole/N-methyl imidazole) and MPB (4-(1-methyl-1H-pyrrol-3-  
348 yl)benzenamine, KMR-28-35) moieties. The MPB subunit was synthesized using Suzuki-  
349 Miyuara conditions previously described (Rahman et al., 2013) (Fig. S1B). These moieties  
350 were linked via Steglich amide bond formation at positions which maintained the overall fit of  
351 the hybrid for the DNA minor groove (C2/C5 for benzofused, C1/C4 for heterocyclic  
352 components), and finally the N10/C11 imine component of the molecule was activated using  
353 tetrakis palladium and pyrrolidine.

### 354 **Bacterial strains and growth conditions**

355 Bacterial strains, plasmids and primers used in the study are listed in Table S1-S3.  
356 Chromosomal deletions and integrations were performed using either a two-step  
357 recombination method with a *sacB* counter-selection marker (Skerker et al., 2005) or using  
358 integrating vectors from Thanbichler et al. (Thanbichler et al., 2007). Transductions were  
359 carried out with  $\Phi$ CR30 (Ely, 1991). *Caulobacter crescentus* cultures were routinely grown at  
360 30°C in PYE (0.2% peptone, 0.1% yeast extract and 0.06% MgSO<sub>4</sub>). For strains expressing *Gam*-  
361 *GFP* under P<sub>xyI</sub>, 0.3% xylose was added 3h prior to imaging.

### 362 **Survival assay**

363 *Caulobacter* cultures were grown in PYE to O.D<sub>600</sub> of 0.3. Serial dilutions in 10-fold increments  
364 were made and 6  $\mu$ l of each dilution (10<sup>-1</sup> to 10<sup>-8</sup>) were spotted on PYE agar containing  
365 appropriate concentrations of different DNA damaging agents. For UV damage, serial  
366 dilutions of the culture were spotted on PYE agar plates and exposed to specific energy

367 settings in a UV Stratalinker 1800 (STRATAGENE). Growth was assessed from the number of  
368 spots on the plates after two days of incubation at 30°C. Percentage survival for each strain  
369 was calculated by normalizing growth of that specific strain on different doses of DNA damage  
370 to that on media without DNA damage.

### 371 **Fluorescence microscopy and image analysis**

372 Saturated overnight cultures were back diluted in fresh PYE and allowed to grow at least for  
373 two generations (approx. 3h) until OD<sub>600</sub> was 0.1. Images were taken without damage  
374 treatment (no damage control) and after treatment with specified doses of DNA damage. 1  
375 ml aliquots of cultures were taken at specified time points, pelleted and resuspended in 100  
376 µl of growth medium. 2 µl of cell suspension was spotted on 1% agarose pads (prepared in  
377 water). Imaging was performed on a wide-field epifluorescence microscope (Eclipse Ti-2E,  
378 Nikon) equipped with a 60X oil immersion objective (plan apochromat objective with NA 1.41)  
379 and pE4000 light source (CoolLED). Images were acquired with Hamamatsu Orca Flash 4.0  
380 camera using NIS-elements software (version 5.1). For quantifying YFP induction under *P<sub>sidA</sub>*  
381 promoter, cells were segmented using Oufiti (Paintdakhi et al., 2016) in MatLab, and  
382 fluorescence intensities normalized to cell lengths were extracted. Percentage cells with DSBs  
383 were quantified by counting cells with Gam-GFP foci using the Cell Counter plugin in ImageJ.  
384 Graphs were plotted in GraphPad Prism 7.

### 385 **Molecular Modelling**

386 The 3D structures of desired B-form DNA sequences from the NA1000 (*Caulobacter*  
387 *crescentus*) genome sequence (15 bp from *dnaE* ORF: 5'-ATCGGCAAGCTGGCC-3', LexA box  
388 within the promoter of *recA*: 5'-GTTCGCAAGATGTTC-3' and *CCNA\_RR0074 sRNA*: 5'-  
389 CCCCTCGCCCTCCT-3',) were generated using PyMOL 2.5 structure Builder. For small  
390 molecule ligands used in this study, 3D structures were generated using Chem3D 20.0  
391 program. The DNA structures were processed (energy minimization and addition of polar  
392 hydrogens) using MGLTools v1.5.7 (<https://autodock.scripps.edu/>). The grid box was  
393 configured for each DNA macromolecule to cover the whole length of the structure so that  
394 the ligand was able to find best possible binding sites along with the DNA structures including  
395 both the major and minor grooves. The small molecular ligands were also processed with the  
396 same tools. Finally, the molecular docking was performed using opensource AutoDock Vina

397 v.1.2.0 (<https://vina.scripps.edu/>) (Trott & Olson, 2009). The default flexible docking  
398 parameters were kept for docking. The post processing of the output files was curated using  
399 PyMOL 2.5 and the molecular interactions were visualized using BIOVIA Discovery Studio  
400 Visualizer.

#### 401 **FRET-based DNA melting:**

402 All FRET duplexes and hairpins were purchased as pairs of complimentary or self-  
403 complimentary single-stranded oligonucleotides in lyophilised form from Eurogentec Ltd. The  
404 oligonucleotides were fluoro-tagged at the 5' position with TAM and 3' position with TAMRA.  
405 Sequences used were as follows; AT-rich sequence (seq-1): 5'-FAM-TAT-ATA-TAG-ATA-TTT-  
406 TTT-TAT-CTA-TAT-ATA-TAMRA-3'; GC-rich sequence (seq-2): 5'-FAM-TAT-AGG-GAC-AGC-CCT-  
407 ATA-3', 3'-TAMRA-ATA-TCC-CTG-TCG-GGA-TAT-5'. Nuclease-free water was used to prepare  
408 stock solutions (20  $\mu$ M) of the oligonucleotide hairpins/duplex strands. These stock solutions  
409 were diluted to concentrations of 400 nM using FRET buffer (50 mM potassium cacodylate,  
410 pH 7.4). The solutions were then heated to 85 °C/80 °C for five/ten minutes (hairpin/duplex  
411 solutions, respectively) using a heating block (Grant-Bio). The solutions were allowed to cool  
412 to room temperature overnight and cooled to -20 °C to complete the annealing process.  
413 Annealed stock solutions were diluted to concentrations of 100 and 10 nM using FRET buffer  
414 to prepare working solutions. PBD monomers, GWL-78 (Wells et al., 2006) and mitomycin C  
415 to be incubated with the DNA duplexes were dissolved in DMSO to form 5 mM solutions.  
416 Working solutions of PBD monomers and mitomycin C (5  $\mu$ M and 1  $\mu$ M) were prepared using  
417 FRET buffer. The working solutions of the compounds and DNA hairpins/duplexes were mixed  
418 (1:1 ratio, 25  $\mu$ L of each solution) in the wells of a 96 well plate (Bio-Rad). The wells were  
419 covered and placed in a DNA Engine Opticon system for melting. The samples were heated  
420 over a range of 30-100 °C, with fluorescence readings (incident radiation 450-495 nm,  
421 detection 515-545 nm) taken at intervals of 0.5 °C. Experimental data was imported into  
422 Origin (OriginLab Corp.), where the curves were smoothed and normalised. Using a script, the  
423 point of inflection of the first derivative of the melting point for each sample on the plate was  
424 calculated. The difference between the melting temperature of each sample and that of the  
425 blank (i.e., the  $\Delta T_m$ ) was used for comparative purposes. Mean is shown from three  
426 independent repeats.

427

428

## 429 **References**

- 430 Aguilera, A., & Gaillard, H. (2014). Transcription and Recombination: When RNA Meets DNA. *Cold*  
431 *Spring Harbor Perspectives in Biology*, 6(8), a016543–a016543.  
432 <https://doi.org/10.1101/cshperspect.a016543>
- 433 Alves, I. R., Lima-Noronha, M. A., Silva, L. G., Fernández-Silva, F. S., Freitas, A. L. D., Marques, M. V.,  
434 & Galhardo, R. S. (2017). Effect of SOS-induced levels of imuABC on spontaneous and  
435 damage-induced mutagenesis in *Caulobacter crescentus*. *DNA Repair*, 59, 20–26.  
436 <https://doi.org/10.1016/j.dnarep.2017.09.003>
- 437 Amundsen, S. K., Spicer, T., Karabulut, A. C., Londoño, L. M., Eberhart, C., Fernandez Vega, V.,  
438 Bannister, T. D., Hodder, P., & Smith, G. R. (2012). Small-Molecule Inhibitors of Bacterial  
439 AddAB and RecBCD Helicase-Nuclease DNA Repair Enzymes. *ACS Chemical Biology*, 7(5),  
440 879–891. <https://doi.org/10.1021/cb300018x>
- 441 Andriollo, P., Hind, C. K., Picconi, P., Nahar, K. S., Jamshidi, S., Varsha, A., Clifford, M., Sutton, J. M., &  
442 Rahman, K. M. (2018). C8-Linked Pyrrolobenzodiazepine Monomers with Inverted Building  
443 Blocks Show Selective Activity against Multidrug Resistant Gram-Positive Bacteria. *ACS*  
444 *Infectious Diseases*, 4(2), 158–174. <https://doi.org/10.1021/acscinfecdis.7b00130>
- 445 Arnould, S., Spanswick, V. J., Macpherson, J. S., Hartley, J. A., Thurston, D. E., Jodrell, D. I., &  
446 Guichard, S. M. (2006). Time-dependent cytotoxicity induced by SJG-136 (NSC 694501):  
447 Influence of the rate of interstrand cross-link formation on DNA damage signaling. *Molecular*  
448 *Cancer Therapeutics*, 5(6), 1602–1609. <https://doi.org/10.1158/1535-7163.MCT-06-0018>
- 449 Badrinarayanan, A., Le, T. B. K., & Laub, M. T. (2015). Rapid pairing and resegregation of distant  
450 homologous loci enables double-strand break repair in bacteria. *The Journal of Cell Biology*,  
451 210(3), 385–400. <https://doi.org/10.1083/jcb.201505019>
- 452 Bargonetti, J., Champeil, E., & Tomasz, M. (2010). Differential Toxicity of DNA Adducts of Mitomycin  
453 *C. Journal of Nucleic Acids*, 2010, 1–6. <https://doi.org/10.4061/2010/698960>
- 454 Beranek, D. T. (1990). Distribution of methyl and ethyl adducts following alkylation with  
455 monofunctional alkylating agents. *Mutation Research/Fundamental and Molecular*  
456 *Mechanisms of Mutagenesis*, 231(1), 11–30. [https://doi.org/10.1016/0027-5107\(90\)90173-2](https://doi.org/10.1016/0027-5107(90)90173-2)
- 457 Bose, D. S., Thompson, A. S., Ching, J., Hartley, J. A., Berardini, M. D., Jenkins, T. C., Neidle, S., Hurley,  
458 L. H., & Thurston, D. E. (1992). Rational design of a highly efficient irreversible DNA  
459 interstrand cross-linking agent based on the pyrrolobenzodiazepine ring system. *Journal of*  
460 *the American Chemical Society*, 114(12), 4939–4941. <https://doi.org/10.1021/ja00038a089>



- 461 Boshoff, H. I. M., Reed, M. B., Barry, C. E., & Mizrahi, V. (2003). DnaE2 polymerase contributes to in  
462 vivo survival and the emergence of drug resistance in *Mycobacterium tuberculosis*. *Cell*,  
463 *113*(2), 183–193.
- 464 Brucoli, F., Guzman, J. D., Basher, M. A., Evangelopoulos, D., McMahon, E., Munshi, T., McHugh, T.  
465 D., Fox, K. R., & Bhakta, S. (2016). DNA sequence-selective C8-linked pyrrolobenzodiazepine–  
466 heterocyclic polyamide conjugates show anti-tubercular-specific activities. *The Journal of*  
467 *Antibiotics*, *69*(12), 843–849. <https://doi.org/10.1038/ja.2016.43>
- 468 Burby, P. E., & Simmons, L. A. (2019). A bacterial DNA repair pathway specific to a natural antibiotic.  
469 *Molecular Microbiology*, *111*(2), 338–353. <https://doi.org/10.1111/mmi.14158>
- 470 Chai, T., Terrettaz, C., & Collier, J. (2021). Spatial coupling between DNA replication and mismatch  
471 repair in *Caulobacter crescentus*. *Nucleic Acids Research*, *49*(6), 3308–3321.  
472 <https://doi.org/10.1093/nar/gkab112>
- 473 Chatterjee, N., & Walker, G. C. (2017). Mechanisms of DNA damage, repair, and mutagenesis.  
474 *Environmental and Molecular Mutagenesis*, *58*(5), 235–263.  
475 <https://doi.org/10.1002/em.22087>
- 476 Cole, J. M., Acott, J. D., Courcelle, C. T., & Courcelle, J. (2018). Limited Capacity or Involvement of  
477 Excision Repair, Double-Strand Breaks, or Translesion Synthesis for Psoralen Cross-Link  
478 Repair in *Escherichia coli*. *Genetics*, *210*(1), 99–112.  
479 <https://doi.org/10.1534/genetics.118.301239>
- 480 Colombi, D., & Gomes, S. L. (1997). An alkB gene homolog is differentially transcribed during the  
481 *Caulobacter crescentus* cell cycle. *Journal of Bacteriology*, *179*(10), 3139–3145.  
482 <https://doi.org/10.1128/jb.179.10.3139-3145.1997>
- 483 Corcoran, D. B., Lewis, T., Nahar, K. S., Jamshidi, S., Fegan, C., Pepper, C., Thurston, D. E., & Rahman,  
484 K. Miraz. (2019). Effects of Systematic Shortening of Noncovalent C8 Side Chain on the  
485 Cytotoxicity and NF-κB Inhibitory Capacity of Pyrrolobenzodiazepines (PBDs). *Journal of*  
486 *Medicinal Chemistry*, *62*(4), 2127–2139. <https://doi.org/10.1021/acs.jmedchem.8b01849>
- 487 de Almeida, L. C., Calil, F. A., Machado-Neto, J. A., & Costa-Lotufo, L. V. (2021). DNA damaging agents  
488 and DNA repair: From carcinogenesis to cancer therapy. *Cancer Genetics*, *252–253*, 6–24.  
489 <https://doi.org/10.1016/j.cancergen.2020.12.002>
- 490 Ely, B. (1991). [17] Genetics of *Caulobacter crescentus*. In *Methods in Enzymology* (Vol. 204, pp. 372–  
491 384). Elsevier. [https://doi.org/10.1016/0076-6879\(91\)04019-K](https://doi.org/10.1016/0076-6879(91)04019-K)
- 492 Fitzgerald, D. M., Hastings, P. J., & Rosenberg, S. M. (2017). Stress-Induced Mutagenesis:  
493 Implications in Cancer and Drug Resistance. *Annual Review of Cancer Biology*, *1*(1), 119–140.  
494 <https://doi.org/10.1146/annurev-cancerbio-050216-121919>

- 495 Galhardo, R. S. (2005). An SOS-regulated operon involved in damage-inducible mutagenesis in  
496 *Caulobacter crescentus*. *Nucleic Acids Research*, *33*(8), 2603–2614.  
497 <https://doi.org/10.1093/nar/gki551>
- 498 Gerratana, B. (2012). Biosynthesis, synthesis, and biological activities of pyrrolobenzodiazepines:  
499 ACTIVITIES OF PYRROLOBENZODIAZEPINES. *Medicinal Research Reviews*, *32*(2), 254–293.  
500 <https://doi.org/10.1002/med.20212>
- 501 Gregson, S. J., Howard, P. W., Hartley, J. A., Brooks, N. A., Adams, L. J., Jenkins, T. C., Kelland, L. R., &  
502 Thurston, D. E. (2001). Design, Synthesis, and Evaluation of a Novel Pyrrolobenzodiazepine  
503 DNA-Interactive Agent with Highly Efficient Cross-Linking Ability and Potent Cytotoxicity.  
504 *Journal of Medicinal Chemistry*, *44*(5), 737–748. <https://doi.org/10.1021/jm001064n>
- 505 Hartley, J. A., Hamaguchi, A., Coffils, M., Martin, C. R. H., Suggitt, M., Chen, Z., Gregson, S. J.,  
506 Masterson, L. A., Tiberghien, A. C., Hartley, J. M., Pepper, C., Lin, T. T., Fegan, C., Thurston, D.  
507 E., & Howard, P. W. (2010). SG2285, a Novel C2-Aryl-Substituted Pyrrolobenzodiazepine  
508 Dimer Prodrug That Cross-links DNA and Exerts Highly Potent Antitumor Activity. *Cancer*  
509 *Research*, *70*(17), 6849–6858. <https://doi.org/10.1158/0008-5472.CAN-10-0790>
- 510 Hoffmann, R. M., Crescioli, S., Mele, S., Sachouli, E., Cheung, A., Chui, C. K., Andriollo, P., Jackson, P.  
511 J. M., Lacy, K. E., Spicer, J. F., Thurston, D. E., & Karagiannis, S. N. (2020). A Novel Antibody-  
512 Drug Conjugate (ADC) Delivering a DNA Mono-Alkylating Payload to Chondroitin Sulfate  
513 Proteoglycan (CSPG4)-Expressing Melanoma. *Cancers*, *12*(4), E1029.  
514 <https://doi.org/10.3390/cancers12041029>
- 515 Hurley, L. H. (1977). Pyrrolo(1,4)benzodiazepine antitumor antibiotics. Comparative aspects of  
516 anthramycin, tomaymycin and sibiromycin. *The Journal of Antibiotics*, *30*(5), 349–370.  
517 <https://doi.org/10.7164/antibiotics.30.349>
- 518 Inomata, Y., Abe, T., Tsuda, M., Takeda, S., & Hirota, K. (2021). Division of labor of Y-family  
519 polymerases in translesion-DNA synthesis for distinct types of DNA damage. *PLOS ONE*,  
520 *16*(6), e0252587. <https://doi.org/10.1371/journal.pone.0252587>
- 521 Ippoliti, P. J., DeLateur, N. A., Jones, K. M., & Beuning, P. J. (2012). Multiple Strategies for Translesion  
522 Synthesis in Bacteria. *Cells*, *1*(4), 799–831. <https://doi.org/10.3390/cells1040799>
- 523 Jackson, P. J. M., Kay, S., Pysz, I., & Thurston, D. E. (2018). Use of pyrrolobenzodiazepines and related  
524 covalent-binding DNA-interactive molecules as ADC payloads: Is mechanism related to  
525 systemic toxicity? *Drug Discovery Today: Technologies*, *30*, 71–83.  
526 <https://doi.org/10.1016/j.ddtec.2018.10.004>
- 527 Jatsenko, T., Sidorenko, J., Saumaa, S., & Kivisaar, M. (2017). DNA Polymerases ImuC and DinB Are  
528 Involved in DNA Alkylation Damage Tolerance in *Pseudomonas aeruginosa* and

- 529 Pseudomonas putida. *PLOS ONE*, 12(1), e0170719.  
530 <https://doi.org/10.1371/journal.pone.0170719>
- 531 Jenkins, T. C., Hurley, L. H., Neidle, S., & Thurston, D. E. (1994). Structure of a Covalent DNA Minor  
532 Groove Adduct with a Pyrrolobenzodiazepine Dimer: Evidence for Sequence-Specific  
533 Interstrand Crosslinking. *Journal of Medicinal Chemistry*, 37(26), 4529–4537.  
534 <https://doi.org/10.1021/jm00052a012>
- 535 Jia, L., Kropachev, K., Ding, S., Van Houten, B., Geacintov, N. E., & Broyde, S. (2009). Exploring  
536 damage recognition models in prokaryotic nucleotide excision repair with a benzo[a]pyrene-  
537 derived lesion in UvrB. *Biochemistry*, 48(38), 8948–8957. <https://doi.org/10.1021/bi9010072>
- 538 Joseph, A. M., & Badrinarayanan, A. (2020). Visualizing mutagenic repair: Novel insights into  
539 bacterial translesion synthesis. *FEMS Microbiology Reviews*, 44(5), 572–582.  
540 <https://doi.org/10.1093/femsre/fuaa023>
- 541 Joseph, A. M., Daw, S., Sadhir, I., & Badrinarayanan, A. (2021). *Coordination between nucleotide*  
542 *excision repair and specialized polymerase DnaE2 action enables DNA damage survival in*  
543 *non-replicating bacteria* [Preprint]. *Microbiology*.  
544 <https://doi.org/10.1101/2021.02.15.431208>
- 545 Kisker, C., Kuper, J., & Van Houten, B. (2013). Prokaryotic nucleotide excision repair. *Cold Spring*  
546 *Harbor Perspectives in Biology*, 5(3), a012591. <https://doi.org/10.1101/cshperspect.a012591>
- 547 Kotecha, M., Kluza, J., Wells, G., O'Hare, C. C., Forni, C., Mantovani, R., Howard, P. W., Morris, P.,  
548 Thurston, D. E., Hartley, J. A., & Hochhauser, D. (2008). Inhibition of DNA binding of the NF- $\kappa$ B  
549 transcription factor by the pyrrolobenzodiazepine-polyamide conjugate GWL-78. *Molecular*  
550 *Cancer Therapeutics*, 7(5), 1319–1328. <https://doi.org/10.1158/1535-7163.MCT-07-0475>
- 551 Kovtun, Y., Noordhuis, P., Whiteman, K. R., Watkins, K., Jones, G. E., Harvey, L., Lai, K. C., Portwood,  
552 S., Adams, S., Sloss, C. M., Schuurhuis, G. J., Ossenkoppele, G., Wang, E. S., & Pinkas, J.  
553 (2018). IMG779, a Novel CD33-Targeting Antibody–Drug Conjugate with DNA-Alkylating  
554 Activity, Exhibits Potent Antitumor Activity in Models of AML. *Molecular Cancer*  
555 *Therapeutics*, 17(6), 1271–1279. <https://doi.org/10.1158/1535-7163.MCT-17-1077>
- 556 Kung Sutherland, M. S., Walter, R. B., Jeffrey, S. C., Burke, P. J., Yu, C., Kostner, H., Stone, I., Ryan, M.  
557 C., Sussman, D., Lyon, R. P., Zeng, W., Harrington, K. H., Klussman, K., Westendorf, L., Meyer,  
558 D., Bernstein, I. D., Senter, P. D., Benjamin, D. R., Drachman, J. G., & McEarchern, J. A.  
559 (2013). SGN-CD33A: A novel CD33-targeting antibody–drug conjugate using a  
560 pyrrolobenzodiazepine dimer is active in models of drug-resistant AML. *Blood*, 122(8), 1455–  
561 1463. <https://doi.org/10.1182/blood-2013-03-491506>

- 562 Leimgruber, W., Stefanović, V., Schenker, F., Karr, A., & Berger, J. (1965). Isolation and  
563 Characterization of Anthramycin, a New Antitumor Antibiotic. *Journal of the American*  
564 *Chemical Society*, 87(24), 5791–5793. <https://doi.org/10.1021/ja00952a050>
- 565 Lim, C. S. Q., Ha, K. P., Clarke, R. S., Gavin, L.-A., Cook, D. T., Hutton, J. A., Sutherell, C. L., Edwards, A.  
566 M., Evans, L. E., Tate, E. W., & Lanyon-Hogg, T. (2019). Identification of a potent small-  
567 molecule inhibitor of bacterial DNA repair that potentiates quinolone antibiotic activity in  
568 methicillin-resistant *Staphylococcus aureus*. *Bioorganic & Medicinal Chemistry*, 27(20),  
569 114962. <https://doi.org/10.1016/j.bmc.2019.06.025>
- 570 Liu, Y., Reeves, D., Kropachev, K., Cai, Y., Ding, S., Kolbanovskiy, M., Kolbanovskiy, A., Bolton, J. L.,  
571 Broyde, S., Van Houten, B., & Geacintov, N. E. (2011). Probing for DNA damage with  $\beta$ -  
572 hairpins: Similarities in incision efficiencies of bulky DNA adducts by prokaryotic and human  
573 nucleotide excision repair systems in vitro. *DNA Repair*, 10(7), 684–696.  
574 <https://doi.org/10.1016/j.dnarep.2011.04.020>
- 575 Lopes-Kulishev, C. O., Alves, I. R., Valencia, E. Y., Pidhirnyj, M. I., Fernández-Silva, F. S., Rodrigues, T.  
576 R., Guzzo, C. R., & Galhardo, R. S. (2015). Functional characterization of two SOS-regulated  
577 genes involved in mitomycin C resistance in *Caulobacter crescentus*. *DNA Repair*, 33, 78–89.  
578 <https://doi.org/10.1016/j.dnarep.2015.06.009>
- 579 Mantaj, J., Jackson, P. J. M., Rahman, K. M., & Thurston, D. E. (2017). From Anthramycin to  
580 Pyrrolobenzodiazepine (PBD)-Containing Antibody-Drug Conjugates (ADCs). *Angewandte*  
581 *Chemie International Edition*, 56(2), 462–488. <https://doi.org/10.1002/anie.201510610>
- 582 Mazloum, N., Stegman, M. A., Croteau, D. L., Van Houten, B., Kwon, N. S., Ling, Y., Dickinson, C.,  
583 Venugopal, A., Towheed, M. A., & Nathan, C. (2011). Identification of a Chemical That  
584 Inhibits the Mycobacterial UvrABC Complex in Nucleotide Excision Repair. *Biochemistry*,  
585 50(8), 1329–1335. <https://doi.org/10.1021/bi101674c>
- 586 Mehta, A., & Haber, J. E. (2014). Sources of DNA Double-Strand Breaks and Models of  
587 Recombinational DNA Repair. *Cold Spring Harbor Perspectives in Biology*, 6(9), a016428–  
588 a016428. <https://doi.org/10.1101/cshperspect.a016428>
- 589 Modell, J. W., Hopkins, A. C., & Laub, M. T. (2011). A DNA damage checkpoint in *Caulobacter*  
590 *crescentus* inhibits cell division through a direct interaction with FtsW. *Genes &*  
591 *Development*, 25(12), 1328–1343. <https://doi.org/10.1101/gad.2038911>
- 592 Morgensztern, D., Besse, B., Greillier, L., Santana-Davila, R., Ready, N., Hann, C. L., Glisson, B. S.,  
593 Farago, A. F., Dowlati, A., Rudin, C. M., Le Moulec, S., Lally, S., Yalamanchili, S., Wolf, J.,  
594 Govindan, R., & Carbone, D. P. (2019). Efficacy and Safety of Rovalpituzumab Tesirine in  
595 Third-Line and Beyond Patients with DLL3-Expressing, Relapsed/Refractory Small-Cell Lung

- 596 Cancer: Results From the Phase II TRINITY Study. *Clinical Cancer Research*, 25(23), 6958–  
597 6966. <https://doi.org/10.1158/1078-0432.CCR-19-1133>
- 598 Ona, K. R., Courcelle, C. T., & Courcelle, J. (2009). Nucleotide Excision Repair Is a Predominant  
599 Mechanism for Processing Nitrofurazone-Induced DNA Damage in *Escherichia coli*. *Journal of*  
600 *Bacteriology*, 191(15), 4959–4965. <https://doi.org/10.1128/JB.00495-09>
- 601 Pages, V. (2003). Uncoupling of Leading- and Lagging-Strand DNA Replication During Lesion Bypass in  
602 *Vivo*. *Science*, 300(5623), 1300–1303. <https://doi.org/10.1126/science.1083964>
- 603 Paintdakhi, A., Parry, B., Campos, M., Irnov, I., Elf, J., Surovtsev, I., & Jacobs-Wagner, C. (2016). Oufiti:  
604 An integrated software package for high-accuracy, high-throughput quantitative microscopy  
605 analysis. *Molecular Microbiology*, 99(4), 767–777. <https://doi.org/10.1111/mmi.13264>
- 606 Picconi, P., Hind, C. K., Nahar, K. S., Jamshidi, S., Di Maggio, L., Saeed, N., Evans, B., Solomons, J.,  
607 Wand, M. E., Sutton, J. M., & Rahman, K. M. (2020). New Broad-Spectrum Antibiotics  
608 Containing a Pyrrolobenzodiazepine Ring with Activity against Multidrug-Resistant Gram-  
609 Negative Bacteria. *Journal of Medicinal Chemistry*, 63(13), 6941–6958.  
610 <https://doi.org/10.1021/acs.jmedchem.0c00328>
- 611 Prakash, S., Johnson, R. E., & Prakash, L. (2005). EUKARYOTIC TRANSLESION SYNTHESIS DNA  
612 POLYMERASES: Specificity of Structure and Function. *Annual Review of Biochemistry*, 74(1),  
613 317–353. <https://doi.org/10.1146/annurev.biochem.74.082803.133250>
- 614 Puzanov, I., Lee, W., Chen, A. P., Calcutt, M. W., Hachey, D. L., Vermeulen, W. L., Spanswick, V. J.,  
615 Liao, C.-Y., Hartley, J. A., Berlin, J. D., & Rothenberg, M. L. (2011). Phase I Pharmacokinetic  
616 and Pharmacodynamic Study of SJG-136, a Novel DNA Sequence Selective Minor Groove  
617 Cross-linking Agent, in Advanced Solid Tumors. *Clinical Cancer Research*, 17(11), 3794–3802.  
618 <https://doi.org/10.1158/1078-0432.CCR-10-2056>
- 619 Rahman, K. M., Jackson, P. J. M., James, C. H., Basu, B. P., Hartley, J. A., de la Fuente, M., Schatzlein,  
620 A., Robson, M., Pedley, R. B., Pepper, C., Fox, K. R., Howard, P. W., & Thurston, D. E. (2013).  
621 GC-Targeted C8-Linked Pyrrolobenzodiazepine–Biaryl Conjugates with Femtomolar in Vitro  
622 Cytotoxicity and in Vivo Antitumor Activity in Mouse Models. *Journal of Medicinal Chemistry*,  
623 56(7), 2911–2935. <https://doi.org/10.1021/jm301882a>
- 624 Rahman, K. M., James, C. H., & Thurston, D. E. (2011). Effect of base sequence on the DNA cross-  
625 linking properties of pyrrolobenzodiazepine (PBD) dimers. *Nucleic Acids Research*, 39(13),  
626 5800–5812. <https://doi.org/10.1093/nar/gkr122>
- 627 Rahman, K. M., Rosado, H., Moreira, J. B., Feuerbaum, E.-A., Fox, K. R., Stecher, E., Howard, P. W.,  
628 Gregson, S. J., James, C. H., de la Fuente, M., Waldron, D. E., Thurston, D. E., & Taylor, P. W.  
629 (2012). Antistaphylococcal activity of DNA-interactive pyrrolobenzodiazepine (PBD) dimers

- 630 and PBD-biaryl conjugates. *Journal of Antimicrobial Chemotherapy*, *67*(7), 1683–1696.  
631 <https://doi.org/10.1093/jac/dks127>
- 632 Rocha, E. P. C., Cornet, E., & Michel, B. (2005). Comparative and Evolutionary Analysis of the  
633 Bacterial Homologous Recombination Systems. *PLoS Genetics*, *1*(2), e15.  
634 <https://doi.org/10.1371/journal.pgen.0010015>
- 635 Rosado, H., Rahman, K. M., Feuerbaum, E.-A., Hinds, J., Thurston, D. E., & Taylor, P. W. (2011). The  
636 minor groove-binding agent ELB-21 forms multiple interstrand and intrastrand covalent  
637 cross-links with duplex DNA and displays potent bactericidal activity against methicillin-  
638 resistant *Staphylococcus aureus*. *Journal of Antimicrobial Chemotherapy*, *66*(5), 985–996.  
639 <https://doi.org/10.1093/jac/dkr044>
- 640 Selby, C. P. (2017). Mfd Protein and Transcription-Repair Coupling in *Escherichia coli*. *Photochemistry*  
641 *and Photobiology*, *93*(1), 280–295. <https://doi.org/10.1111/php.12675>
- 642 Selby, C., & Sancar, A. (1993). Molecular mechanism of transcription-repair coupling. *Science*,  
643 *260*(5104), 53–58. <https://doi.org/10.1126/science.8465200>
- 644 Shee, C., Cox, B. D., Gu, F., Luengas, E. M., Joshi, M. C., Chiu, L.-Y., Magnan, D., Halliday, J. A., Frisch,  
645 R. L., Gibson, J. L., Nehring, R. B., Do, H. G., Hernandez, M., Li, L., Herman, C., Hastings, P.,  
646 Bates, D., Harris, R. S., Miller, K. M., & Rosenberg, S. M. (2013). Engineered proteins detect  
647 spontaneous DNA breakage in human and bacterial cells. *ELife*, *2*, e01222.  
648 <https://doi.org/10.7554/eLife.01222>
- 649 Skerker, J. M., Prasol, M. S., Perchuk, B. S., Biondi, E. G., & Laub, M. T. (2005). Two-Component Signal  
650 Transduction Pathways Regulating Growth and Cell Cycle Progression in a Bacterium: A  
651 System-Level Analysis. *PLoS Biology*, *3*(10), e334.  
652 <https://doi.org/10.1371/journal.pbio.0030334>
- 653 Spies, M., & Kowalczykowski, S. C. (2014). Homologous Recombination by the RecBCD and RecF  
654 Pathways. In N. P. Higgins (Ed.), *The Bacterial Chromosome* (pp. 389–403). ASM Press.  
655 <https://doi.org/10.1128/9781555817640.ch21>
- 656 Strick, T. R., & Portman, J. R. (2019). Transcription-Coupled Repair: From Cells to Single Molecules  
657 and Back Again. *Journal of Molecular Biology*, *431*(20), 4093–4102.  
658 <https://doi.org/10.1016/j.jmb.2019.05.040>
- 659 Surova, O., & Zhivotovsky, B. (2013). Various modes of cell death induced by DNA damage.  
660 *Oncogene*, *32*(33), 3789–3797. <https://doi.org/10.1038/onc.2012.556>
- 661 Thanbichler, M., Iniesta, A. A., & Shapiro, L. (2007). A comprehensive set of plasmids for vanillate-  
662 and xylose-inducible gene expression in *Caulobacter crescentus*. *Nucleic Acids Research*,  
663 *35*(20), e137. <https://doi.org/10.1093/nar/gkm818>

- 664 Thurston, D. E., Bose, D. S., Howard, P. W., Jenkins, T. C., Leoni, A., Baraldi, P. G., Guiotto, A.,  
665 Cacciari, B., Kelland, L. R., Foloppe, M.-P., & Rault, S. (1999). Effect of A-Ring Modifications  
666 on the DNA-Binding Behavior and Cytotoxicity of Pyrrolo[2,1- c ][1,4]benzodiazepines.  
667 *Journal of Medicinal Chemistry*, 42(11), 1951–1964. <https://doi.org/10.1021/jm981117p>
- 668 Tomasz, M. (1995). Mitomycin C: Small, fast and deadly (but very selective). *Chemistry & Biology*,  
669 2(9), 575–579. [https://doi.org/10.1016/1074-5521\(95\)90120-5](https://doi.org/10.1016/1074-5521(95)90120-5)
- 670 Trott, O., & Olson, A. J. (2009). AutoDock Vina: Improving the speed and accuracy of docking with a  
671 new scoring function, efficient optimization, and multithreading. *Journal of Computational*  
672 *Chemistry*, NA-NA. <https://doi.org/10.1002/jcc.21334>
- 673 Warner, D. F., Ndwandwe, D. E., Abrahams, G. L., Kana, B. D., Machowski, E. E., Venclovas, C., &  
674 Mizrahi, V. (2010). Essential roles for imuA'- and imuB-encoded accessory factors in DnaE2-  
675 dependent mutagenesis in Mycobacterium tuberculosis. *Proceedings of the National*  
676 *Academy of Sciences of the United States of America*, 107(29), 13093–13098.  
677 <https://doi.org/10.1073/pnas.1002614107>
- 678 Warren, A. J., Maccubbin, A. E., & Hamilton, J. W. (1998). Detection of mitomycin C-DNA adducts in  
679 vivo by 32P-postlabeling: Time course for formation and removal of adducts and biochemical  
680 modulation. *Cancer Research*, 58(3), 453–461.
- 681 Waters, L. S., Minesinger, B. K., Wiltrout, M. E., D'Souza, S., Woodruff, R. V., & Walker, G. C. (2009).  
682 Eukaryotic Translesion Polymerases and Their Roles and Regulation in DNA Damage  
683 Tolerance. *Microbiology and Molecular Biology Reviews*, 73(1), 134–154.  
684 <https://doi.org/10.1128/MMBR.00034-08>
- 685 Wells, G., Martin, C. R. H., Howard, P. W., Sands, Z. A., Loughton, C. A., Tiberghien, A., Woo, C. K.,  
686 Masterson, L. A., Stephenson, M. J., Hartley, J. A., Jenkins, T. C., Shnyder, S. D., Loadman, P.  
687 M., Waring, M. J., & Thurston, D. E. (2006). Design, Synthesis, and Biophysical and Biological  
688 Evaluation of a Series of Pyrrolobenzodiazepine–Poly( N -methylpyrrole) Conjugates. *Journal*  
689 *of Medicinal Chemistry*, 49(18), 5442–5461. <https://doi.org/10.1021/jm051199z>
- 690 Williams, H. L., Gottesman, M. E., & Gautier, J. (2013). The differences between ICL repair during and  
691 outside of S phase. *Trends in Biochemical Sciences*, 38(8), 386–393.  
692 <https://doi.org/10.1016/j.tibs.2013.05.004>
- 693 Xing, L., Lin, L., Yu, T., Li, Y., Wen, K., Cho, S.-F., Hsieh, P. A., Kinneer, K., Munshi, N. C., Anderson, K.  
694 C., & Tai, Y.-T. (2019). Anti-Bcma PBD MEDI2228 Combats Drug Resistance and Synergizes  
695 with Bortezomib and Inhibitors to DNA Damage Response in Multiple Myeloma. *Blood*,  
696 134(Supplement\_1), 1817–1817. <https://doi.org/10.1182/blood-2019-127163>

697 Zhong, H., Chen, C., Tammali, R., Breen, S., Zhang, J., Fazenbaker, C., Kennedy, M., Conway, J., Higgs,  
698 B. W., Holoweckyj, N., Raja, R., Harper, J., Pierce, A. J., Herbst, R., & Tice, D. A. (2019).  
699 Improved Therapeutic Window in *BRCA* -mutant Tumors with Antibody-linked  
700 Pyrrolobenzodiazepine Dimers with and without PARP Inhibition. *Molecular Cancer*  
701 *Therapeutics*, 18(1), 89–99. <https://doi.org/10.1158/1535-7163.MCT-18-0314>  
702  
703  
704



705 **Author contributions**

706 AJ led the project, generated tools and reagents, carried out *in vivo* experiments in  
707 *Caulobacter* and conducted data analysis. SD contributed tools and reagents, and carried out  
708 *in vivo* experiments. KN and MMH carried out experiments pertaining to the KMR compounds  
709 synthesis and *in vitro* characterization. RL and TL contributed tools and reagents. KMR and AB  
710 conceived and supervised the project. AJ, KMR and AB procured funding and wrote the  
711 manuscript, with feedback from all authors.

712 **Acknowledgements**

713 AJ and AB thank members of the AB lab for feedback on the work. AJ acknowledges support  
714 from DST N-PDF SERB. AB acknowledges support from the DBT-IYBA grant and intra-mural  
715 funding from NCBS-TIFR. TL acknowledges support from the Royal Society University Research  
716 Fellowship Renewal (URF\R\201020) and BBSRC (BBS/E/J/000PR9791).

717 **Declaration of interests**

718 None declared.

719

720 **Main Figure legends:**

721 **Figure 1: C8-linked PBD bi-aryl monomers KMR-28-33 and KMR-28-35.** (A): Structures of  
722 KMR-28-33 and KMR-28-35; pyrrolo(2,1-c)(1,4)benzodiazepine (PBD) unit is highlighted by  
723 the red square, Py - 1-methylpyrrol-3-amine, BztMC - methyl 5-aminobenzothiophene-2-  
724 carboxylate, MPB - 4-(1-methyl-1H-pyrrol-3-yl)benzenamine. (B) Molecular docking of KMR-  
725 28-33 and KMR-28-35 with 15 bp DNA sequence taken from the ORF of *dnaE* gene (5'-  
726 ATCGGCAAGCTGGCC-3'; GC content – 66%) suggests snug fit of both KMR-28-33 and KMR-28-  
727 35 within the DNA minor groove.

728 **Figure 2: KMR-28-33 and KMR-28-35 treatment causes cell death and induces the SOS**  
729 **response.** (A) Representative images of wild type *Caulobacter crescentus* growth on  
730 increasing concentrations of DNA damaging agents KMR-28-33, KMR-28-35 and MMC. Grey  
731 triangle at the bottom of each image panel depicts increasing dilution of the bacterial culture  
732 from left to right. Minimum of two independent experiments were performed for each dose.  
733 (B) [left] SOS induction is measured by assessing the expression of YFP from an SOS-inducible  
734 promoter (*P<sub>sidA</sub>-yfp*). Representative images of cells expressing the reporter with and without  
735 treatment with KMR-28-33 (0.5 µg/ml), KMR-28-35 (1 µg/ml) or MMC (0.5 µg/ml). Scale bar  
736 – 4 µm. [right] Total fluorescence intensity normalized to cell area plotted for indicated  
737 duration of damage treatment. Each dot represents a single cell. Mean and SD are shown in  
738 black (n ≥ 215).

739 **Figure 3: Requirement for RecA, but not the SOS response, in C8-linked PBD bi-aryl**  
740 **monomer-treated cells.** (A) Survival of wild type,  $\Delta recA$  and  $\Delta recA\Delta lexA\Delta sidA$  strains under  
741 increasing doses of KMR-28-33, KMR-28-35 and MMC. Minimum of three independent  
742 experiments were performed for each strain. Mean and SEM from all repeats for each strain  
743 is plotted. (B) Survival of wild type and  $\Delta dnaE2$  strains under increasing doses of KMR-28-33,  
744 KMR-28-35 and MMC. Minimum of three independent experiments were performed for each  
745 strain. Mean and SEM from all repeats for each strain is plotted (wild type data from Figure  
746 3A for comparison).

747 **Figure 4: Recombination-mediated repair contributes to survival under DNA damage caused**  
748 **by KMR-28-33 and KMR-28-35.** (A) Survival of wild type,  $\Delta recA$ ,  $\Delta addAB$  and  $\Delta recN$  strains  
749 under increasing doses of KMR-28-33, KMR-28-35 and MMC. Minimum of three independent

750 experiments were performed for each strain. Mean and SEM from all repeats for each strain  
751 is plotted (wild type and  $\Delta recA$  data from Figure 3A for comparison). (B) Survival of wild type,  
752  $\Delta recF$ ,  $\Delta recO$  and  $\Delta recR$  strains under increasing doses of KMR-28-33, KMR-28-35 and MMC.  
753 Minimum of three independent experiments were performed for each strain. Mean and SEM  
754 from all repeats for each strain is plotted (wild type data from Figure 3A for comparison).

755 **Figure 5: Nucleotide excision repair (NER) is essential for survival under KMR-28-33 and**  
756 **KMR-28-35-induced DNA damage.** (A) Survival of wild type,  $\Delta recA$  and  $\Delta uvrA$  strains under  
757 increasing doses of KMR-28-33, KMR-28-35 and MMC. Minimum of three independent  
758 experiments were performed for each strain. Mean and SEM from all repeats for each strain  
759 was plotted (wild type and  $\Delta recA$  data from Figure 3A for comparison). (B) [left]  
760 Representative images for cells with Gam-GFP foci upon treatment with KMR-28\_33, KMR-  
761 28-35 and MMC in wild type and  $\Delta uvrA$  strains (wild type images from Figure S3A for  
762 comparison). Scale bar – 4  $\mu$ m. [right] Percentage cells with Gam-GFP foci upon treatment  
763 with KMR-28-33, KMR-28-35 and MMC in wild type and  $\Delta uvrA$  strains (wild type data from  
764 Figure S3A for comparison). Mean and SD for data from three independent experiments is  
765 plotted ( $n \geq 330$  cells).

766

**Figure 1**

**A.**

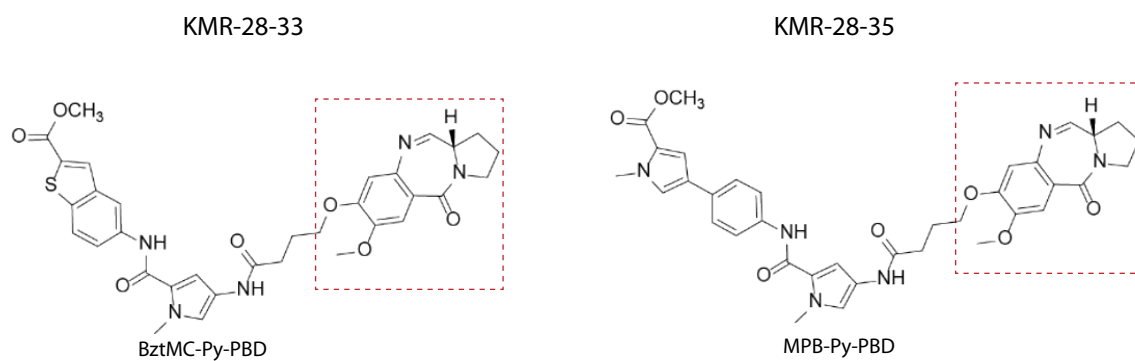

**B.**

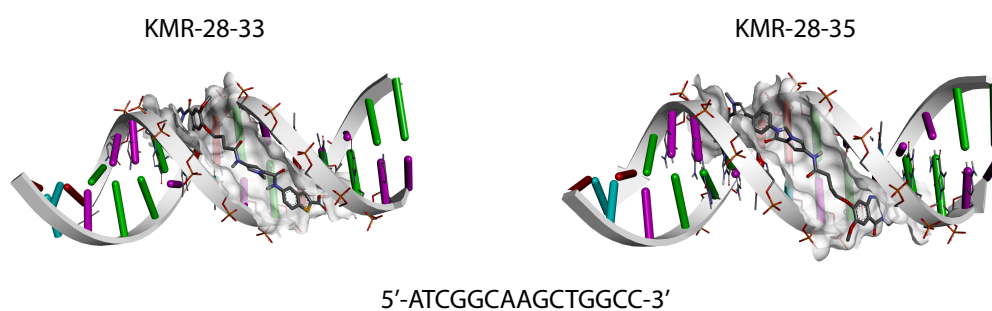

**Figure 2**

**A.**

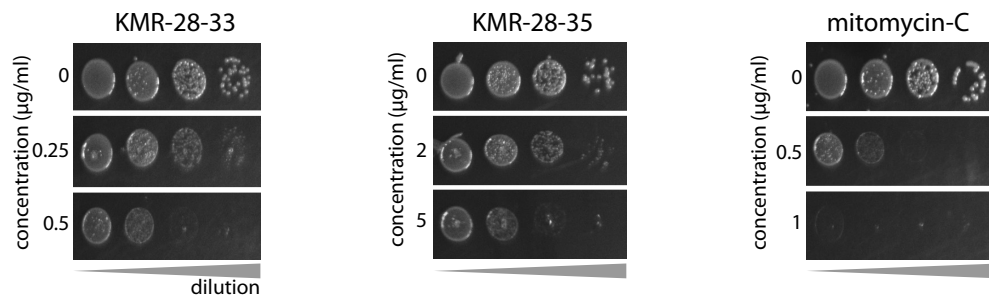

**B.**

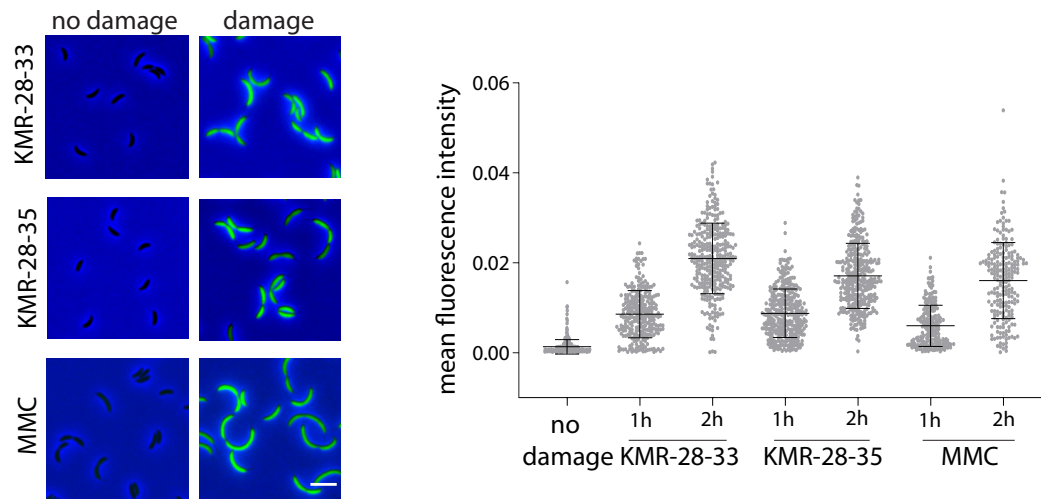

**Figure 3**

**A.**

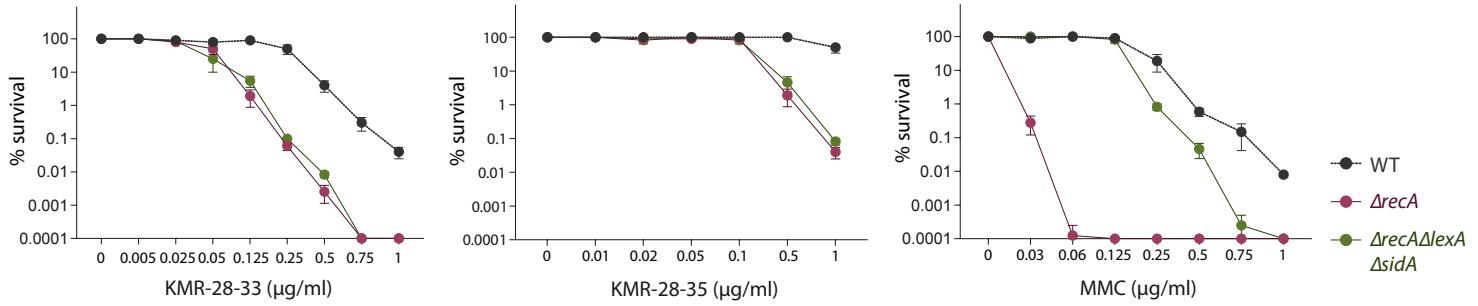

**B.**

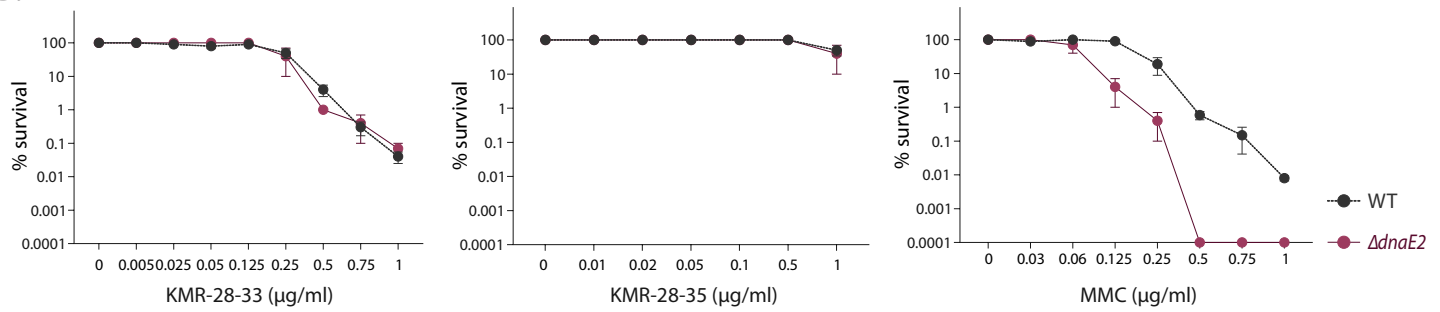

Figure 4

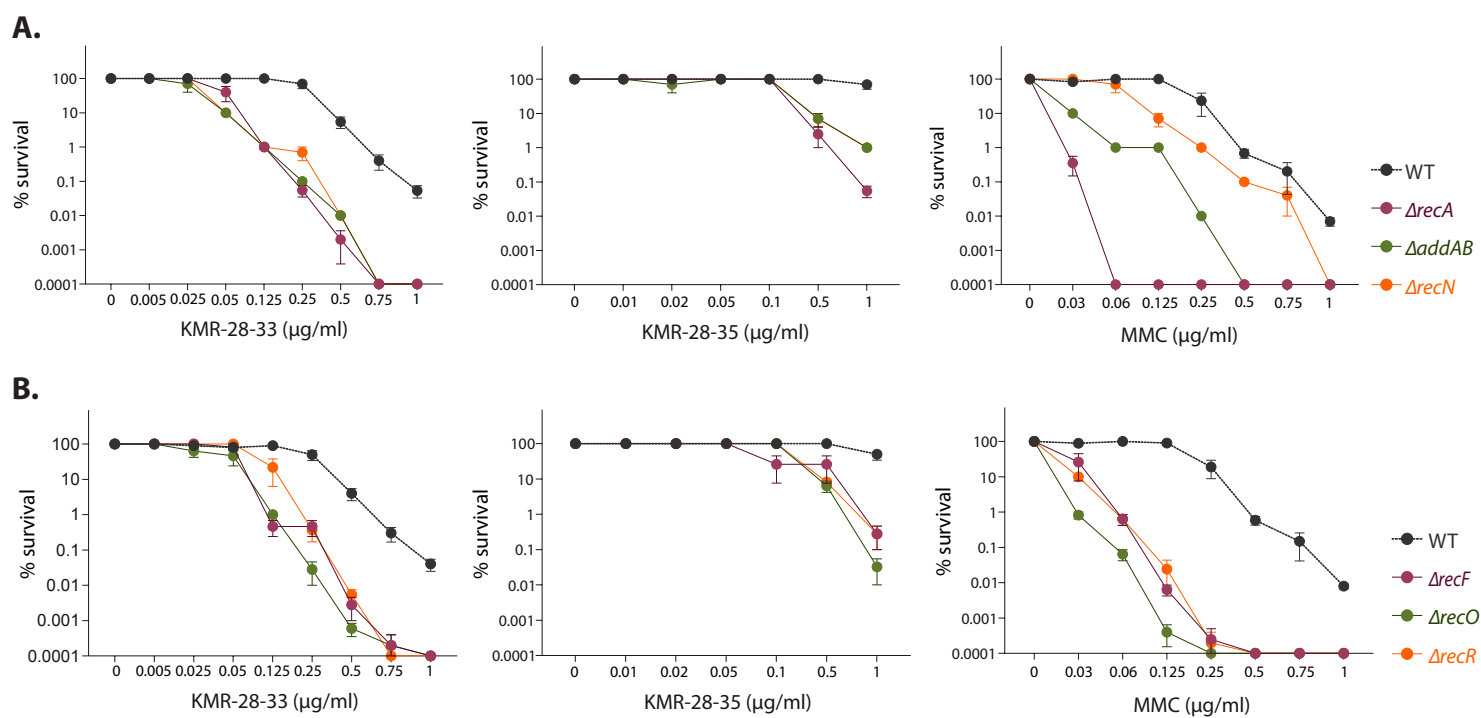

**Figure 5**

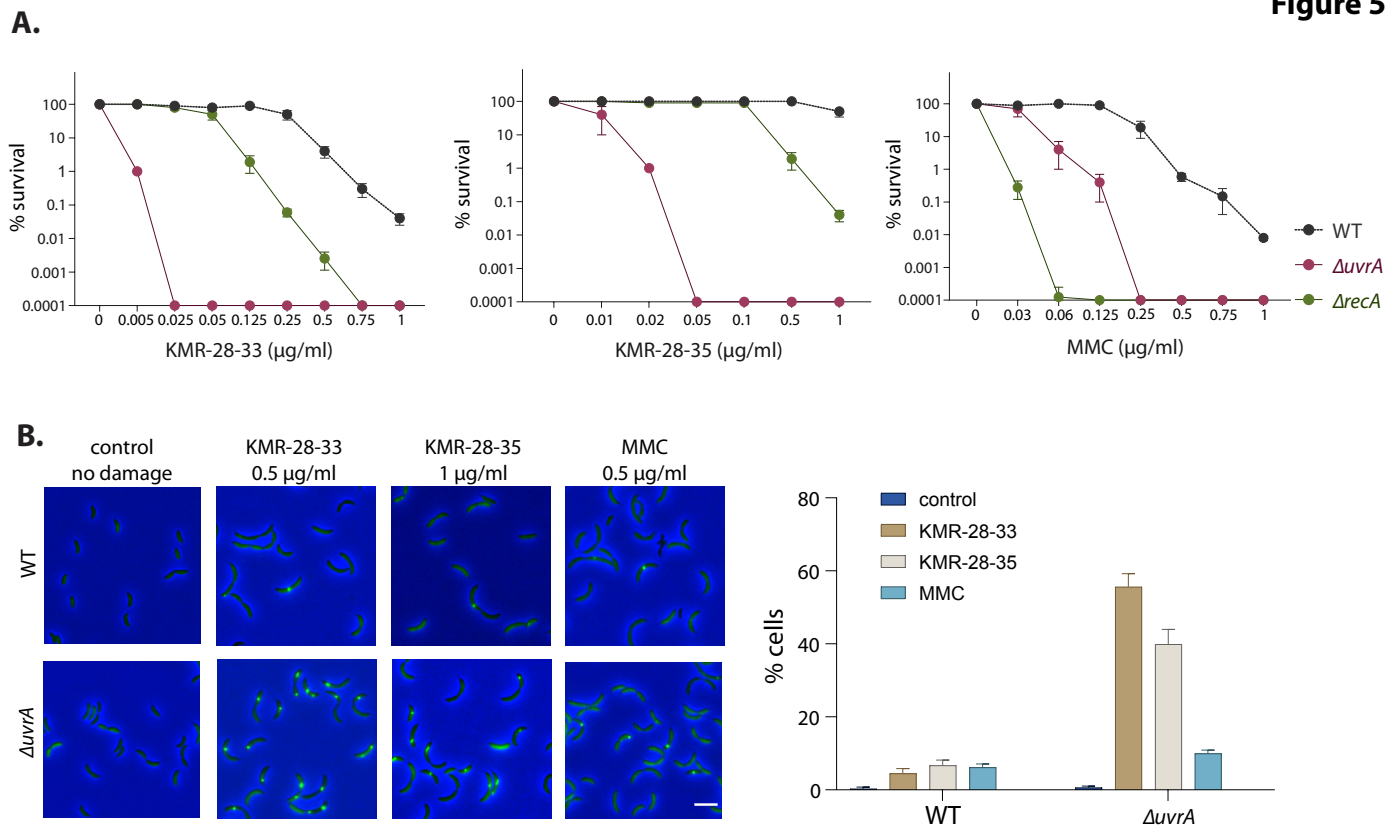



1 **Supplementary Information**

2

3

4 **Requirement for specific bacterial genome maintenance pathways in repair**  
5 **of C8-linked pyrrolobenzodiazepine (PBD) bi-aryl monomer-mediated DNA**  
6 **damage**

7

8

9 Asha Mary Joseph<sup>1</sup>, Kazi Nahar<sup>2</sup>, Saheli Daw<sup>1</sup>, Md. Mahbub Hasan<sup>2</sup>, Rebecca Lo<sup>3†</sup>, Tung B. K.  
10 Le<sup>3</sup>, Khondaker Miraz Rahman<sup>2</sup> and Anjana Badrinarayanan<sup>1</sup>

11 <sup>1</sup>National Centre for Biological Sciences (Tata Institute of Fundamental Research), Bangalore, India

12 <sup>2</sup> School of Cancer & Pharmaceutical Sciences, Faculty of Life Sciences & Medicine, King's College  
13 London, Franklin-Wilkins Building, 150 Stamford Street, London, SE1 9NH, UK.

14 <sup>3</sup> John Innes Centre, Department of Molecular Microbiology, Colney Lane , Norwich, NR4 7UH, UK.

15 <sup>†</sup>Current address: University Hospitals of Leicester, Leicester Royal Infirmary, Chemical Pathology,  
16 Leicester, LE1 5WW, UK

17

18 \*correspondence to [k.miraz.rahman@kcl.ac.uk](mailto:k.miraz.rahman@kcl.ac.uk), [anjana@ncbs.res.in](mailto:anjana@ncbs.res.in)

19

20

21

## 22 Supplementary Figures:

**Figure S1**

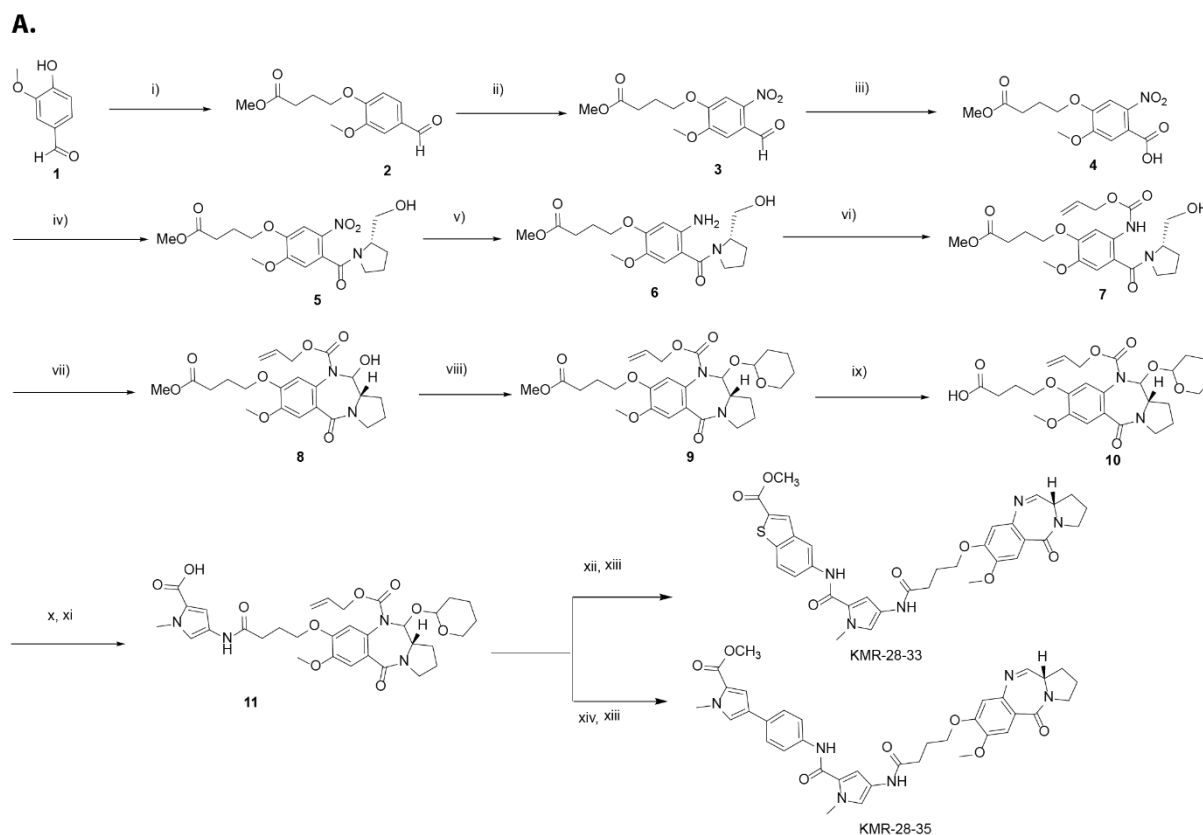

**B.**

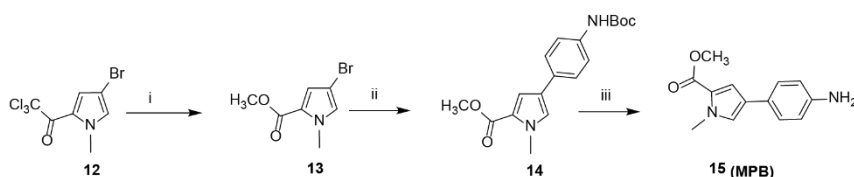

23

24 **Figure S1:** (A) General synthetic scheme for the synthesis of PBD core (10) and the conjugation  
 25 of C8-side chain to the PBD core to obtain KMR-28-33 and KMR-28-35. (B) Synthesis of MPB  
 26 building block 15 which is present in KMR-28-35.

27

28

Figure S2

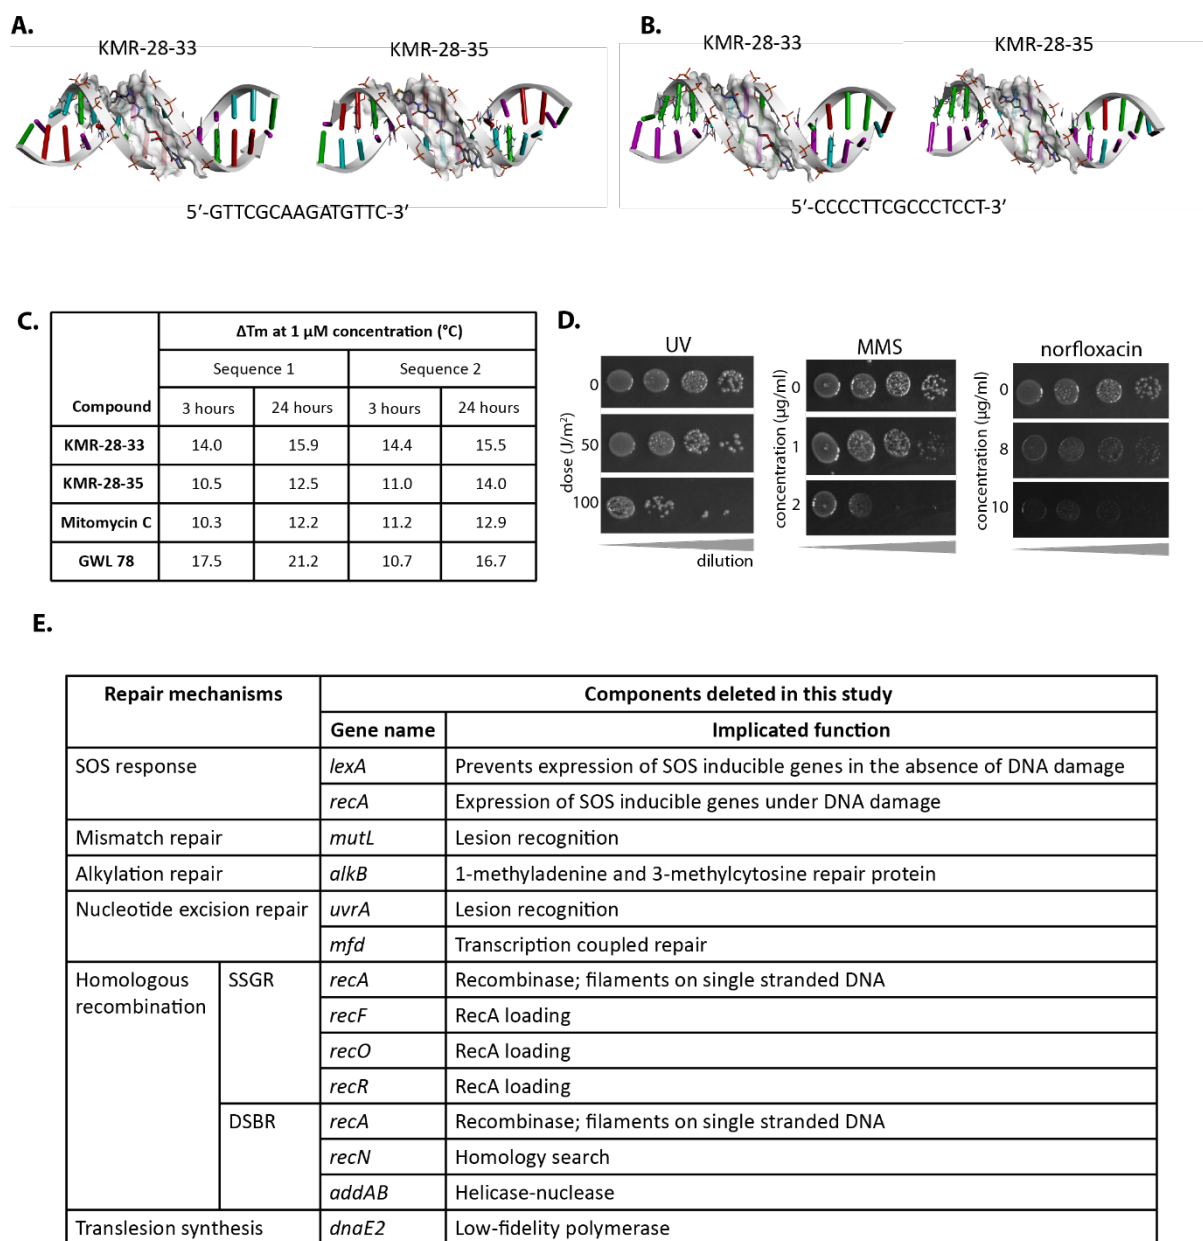

29

30 **Figure S2:** (A) Molecular docking of KMR-28-33 and KMR-28-35 with 15 bp DNA sequence  
 31 taken from the LexA box within the promoter of *recA* gene (5'-GTTCGCAAGATGTTTC-3'; GC  
 32 content – 46%). (B) Molecular docking of KMR-28-33 and KMR-28-35 with 15 bp DNA  
 33 sequence taken from the sRNA gene *CCNA\_R0074* (5'-CCCCTTCGCCCTCCT-3'; GC content –  
 34 73%) (C) DNA thermal stabilization data for KMR-28-33, KMR-28-35 and mitomycin C with an  
 35 AT-rich (seq-1) and a GC-rich (seq-2) hairpin DNA sequence. As a positive control, previously  
 36 characterized compound GWL-78 is used. Average from three replicates shown (see methods  
 37 for details of experimental setup). (D) Representative images of wild type *Caulobacter*  
 38 *crescentus* growth on increasing concentrations of DNA damaging agents UV, MMS and  
 39 norfloxacin. Grey triangle at the bottom of each image panel depicts increasing dilution of the  
 40 bacterial culture from left to right. Minimum of three independent experiments were

41 performed for each condition. (E) Table of all the repair components deleted in this study and  
42 their ascribed functions; SSGR – single-strand gap repair, DSBR – double-strand break repair.  
43

Figure S3

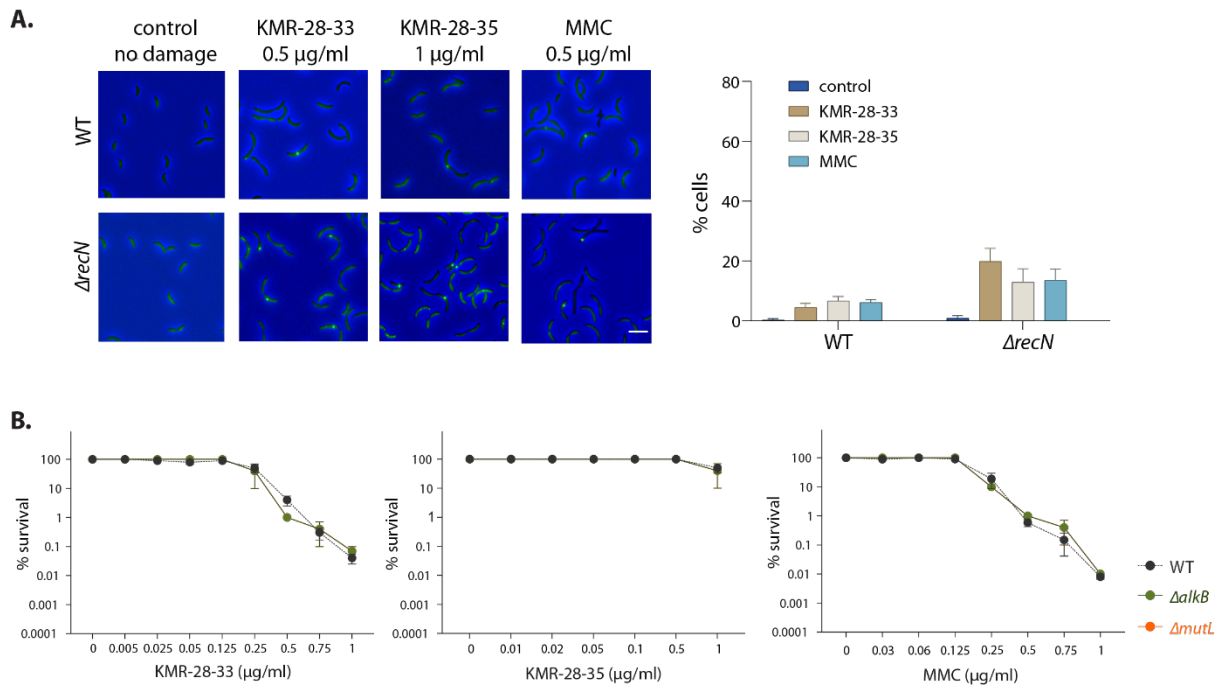

44

45 **Figure S3:** (A) [left] Representative images for cells with Gam-GFP foci upon treatment with  
 46 KMR-28-33, KMR-28-35 and MMC in wild type and  $\Delta\text{recN}$  strains. Scale bar – 4  $\mu\text{m}$ . [right]  
 47 Percentage cells with Gam-GFP foci upon treatment with KMR-28-33, KMR-28-35 and MMC  
 48 in wild type and  $\Delta\text{recN}$  strains. Mean and SD for data from three independent experiments is  
 49 plotted ( $n \leq 330$  cells). (B) Survival of wild type,  $\Delta\text{mutL}$  and  $\Delta\text{alkB}$  strains under increasing  
 50 doses of KMR-28-33, KMR-28-35 and MMC. Minimum of three independent experiments  
 51 were performed for each strain. Mean and SEM from all repeats for each strain is plotted  
 52 (wild type data from Figure 3A for comparison).

53

Figure S4

A.

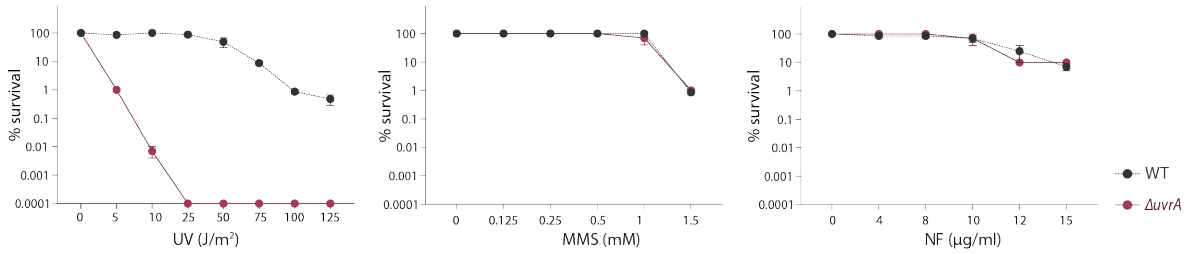

B.

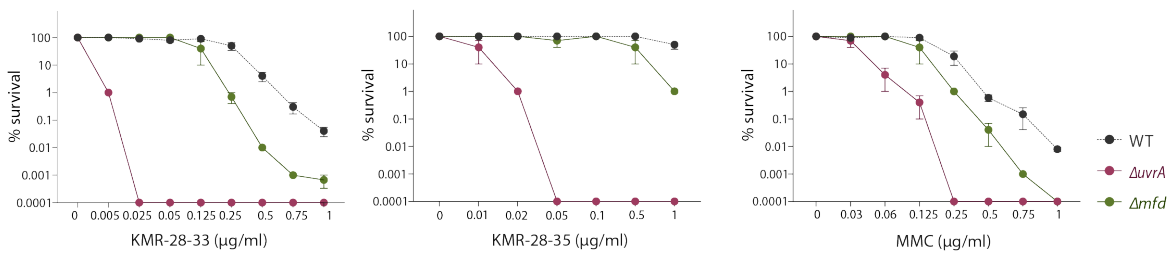

54

55 **Figure S4:** (A) Survival of wild type and  $\Delta uvrA$  strains under increasing doses of UV, MMS and  
56 norfloxacin (NF) damage. Minimum of three independent experiments were performed for  
57 each strain. Mean and SEM from all repeats for each strain is plotted. (B) Survival of wild type,  
58  $\Delta uvrA$  and  $\Delta mfd$  strains under increasing doses of KMR-28-33, KMR-28-35 and MMC.  
59 Minimum of three independent experiments were performed for each strain. Mean and SEM  
60 from all repeats for each strain is plotted (wild type and  $\Delta uvrA$  data from Figure 3A for  
61 comparison).

62

**Figure S5**

| DNA damage        | Lesion type                                                        | Repaired by                                                                 |
|-------------------|--------------------------------------------------------------------|-----------------------------------------------------------------------------|
| KMR-28-33         | Mono-adducts                                                       | Nucleotide excision repair<br>Recombination repair                          |
| KMR-28-35         | Mono-adducts                                                       | Nucleotide excision repair<br>Recombination repair                          |
| Mitomycin C (MMC) | Mono-adducts<br>intra-strand crosslinks<br>inter-strand crosslinks | Nucleotide excision repair<br>Translesion synthesis<br>Recombination repair |

63

64 **Figure S5:** Table summarizing findings from this study on DNA repair mechanisms essential  
65 for repair/tolerance of lesions induced by KMR-28-33, KMR-28-35 and MMC.

66

67 **Table S1: Strains used in present study**

| Strain name | Genotype                                                            | Strain construction                                                                                                                                 |
|-------------|---------------------------------------------------------------------|-----------------------------------------------------------------------------------------------------------------------------------------------------|
| CB15N       |                                                                     |                                                                                                                                                     |
| NABC2       | <i>CB15N; ΔrecA</i>                                                 | (Modell et al., 2014)                                                                                                                               |
| NABC29      | <i>CB15N; ΔdnaE2</i>                                                | CB15N was transformed with pNABC148 plasmid to generate deletion of <i>dnaE2</i> through two-step recombination procedure.                          |
| NABC238     | <i>CB15N; ΔuvrA</i>                                                 | CB15N transformed with pNABC417 plasmid to generate deletion of <i>uvrA</i> through two-step recombination procedure.                               |
| NABC239     | <i>CB15N; ΔaddAB::gent</i>                                          | CB15N transduced with lysate of strain harboring deletion of <i>addAB</i> linked to <i>gent<sup>R</sup></i>                                         |
| NABC265     | <i>CB15N; ΔrecA::kan<sup>R</sup>, ΔlexA::tet<sup>R</sup>, ΔsidA</i> | <i>CB15N; ΔlexA::tet<sup>R</sup>, ΔsidA</i> strain transduced with lysate of strain harboring <i>recA</i> deletion linked to <i>kan<sup>R</sup></i> |
| NABC268     | <i>CB15N; P<sub>xyI</sub>-Gam-GFP::spec<sup>R</sup></i>             | CB15N transformed with pNABC592 plasmid                                                                                                             |
| NABC439     | <i>CB15N; ΔrecN</i>                                                 | (Badrinarayanan et al., 2015)                                                                                                                       |
| NABC499     | <i>CB15N; ΔrecF</i>                                                 | CB15N transformed with pYY193 plasmid to generate deletion of <i>recF</i> (3rd-100 <sup>th</sup> codon) through two-step recombination procedure.   |
| NABC502     | <i>CB15N; ΔrecR</i>                                                 | CB15N transformed with pYY115 plasmid to generate deletion of <i>recR</i> through two-step recombination procedure.                                 |
| NABC505     | <i>CB15N; ΔrecO</i>                                                 | CB15N transformed with pYY119 plasmid to generate deletion of <i>recO</i> through two-step recombination procedure.                                 |
| NABC544     | <i>CB15N; Δmfd</i>                                                  | CB15N transformed with pNABC590 plasmid to generate deletion of <i>mfd</i> through two-step recombination procedure.                                |
| NABC579     | <i>CB15N; ΔalkB</i>                                                 | CB15N transformed with pNABC591 plasmid to generate deletion of <i>alkB</i> through two-step recombination procedure.                               |
| NABC580     | <i>CB15N; ΔmutL</i>                                                 | CB15N transformed with pNABC416 plasmid to generate deletion of <i>mutL</i> through two-step recombination procedure.                               |
| NABC581     | <i>CB15N; P<sub>sidA</sub>-YFP::kan<sup>R</sup></i>                 | CB15N transformed with pNABC420 (Chimthanawala et al., 2021)                                                                                        |



|         |                                                                                  |                                           |
|---------|----------------------------------------------------------------------------------|-------------------------------------------|
| NABC582 | <i>CB15N; ΔuvrA; P<sub>xyI</sub>-Gam-GFP::spec<sup>R</sup></i>                   | NABC238 transformed with pNABC592 plasmid |
| NABC583 | <i>CB15N; ΔrecN::spec<sup>R</sup>; P<sub>xyI</sub>-Gam-GFP::spec<sup>R</sup></i> | NABC439 transformed with pNABC592 plasmid |

69 **Table S2: Plasmids used in present study**

| <b>Plasmid name</b> | <b>Construct details</b>                                                                                                                                                                                                                                                                                                                                                                  | <b>Antibiotic marker</b> |
|---------------------|-------------------------------------------------------------------------------------------------------------------------------------------------------------------------------------------------------------------------------------------------------------------------------------------------------------------------------------------------------------------------------------------|--------------------------|
| pNPTS138            | (Skerker et al., 2005)                                                                                                                                                                                                                                                                                                                                                                    | Kanamycin                |
| pXGFPC1             | (Thanbichler et al., 2007)                                                                                                                                                                                                                                                                                                                                                                | Spectinomycin            |
| pXYFPC2             | (Thanbichler et al., 2007)                                                                                                                                                                                                                                                                                                                                                                | Kanamycin                |
| pNABC148            | 600 bp fragments upstream and downstream of <i>dnaE2</i> genomic locus were amplified from <i>C. crescentus</i> gDNA using RR_oligo_021/RR_oligo_022 (upstream fragment) and RR_oligo_023/RR_oligo_024 (downstream fragment) primer pairs. These fragments were assembled with BamH1/Nhe1 linearized pNPTS138 vector using Gibson assembly.                                               | Kanamycin                |
| pNABC416            | 600 bp fragments upstream and downstream of <i>mutL</i> genomic locus were amplified from <i>C. crescentus</i> gDNA using PS_oligo_049/AMJ_oligo_061 (upstream fragment) and AMJ_oligo_062/PS_oligo_054 (downstream fragment) primer pairs. These fragments were assembled with BamH1/Nhe1 linearized pNPTS138 vector using Gibson assembly.                                              | Kanamycin                |
| pNABC417            | 600 bp fragments upstream and downstream of <i>uvrA</i> genomic locus were amplified from <i>C. crescentus</i> gDNA using PS_oligo_037/AMJ_oligo_057 (upstream fragment) and AMJ_oligo_058/PS_oligo_042 (downstream fragment) primer pairs. These fragments were assembled with BamH1/Nhe1 linearized pNPTS138 vector using Gibson assembly.                                              | Kanamycin                |
| pYY193              | 500 bp fragments upstream and downstream of <i>recF</i> (from the 3 <sup>rd</sup> to the 100 <sup>th</sup> codon) were amplified from <i>C. crescentus</i> gDNA using UPdel00158_F/UPdel00158_R (upstream fragment) and DWNdel00158_F/DWNdel00158_R (downstream fragment) primer pairs. These fragments were assembled with EcoRI/BamHI linearized pNPTS138 vector using Gibson assembly. | Kanamycin                |
| pYY115              | 500 bp fragments upstream and downstream of <i>recR</i> were amplified from <i>C. crescentus</i> gDNA using UPdel00270_F/UPdel00270_R (upstream fragment) and DWNdel00270_F/DWNdel00270_R (downstream fragment) primer pairs. These fragments were assembled with EcoRI/BamHI linearized pNPTS138 vector using Gibson assembly.                                                           | Kanamycin                |

|          |                                                                                                                                                                                                                                                                                                                                               |               |
|----------|-----------------------------------------------------------------------------------------------------------------------------------------------------------------------------------------------------------------------------------------------------------------------------------------------------------------------------------------------|---------------|
| pYY119   | 500 bp fragments upstream and downstream of <i>recO</i> were amplified from <i>C. crescentus</i> gDNA using UPdel01635_F/UPdel01635_R (upstream fragment) and DWNdel01635_F/DWNdel01635_R (downstream fragment) primer pairs. These fragments were assembled with EcoRI/BamHI linearized pNPTS138 vector using Gibson assembly.               | Kanamycin     |
| pNABC420 | pXYFPC2 vector was amplified using AB_oligo_651 and AB_oligo_652 and P <sub>sidA</sub> -YFP fragment was amplified from a replicating plasmid harbouring YFP under P <sub>sidA</sub> promoter using AC_oligo_322 and AC_oligo_321. The vector and insert fragments were assembled with Gibson assembly.                                       | Kanamycin     |
| pNABC590 | 600 bp fragments upstream and downstream of <i>mfd</i> genomic locus were amplified from <i>C. crescentus</i> gDNA using SD_oligo_088/SD_oligo_089 (upstream fragment) and SD_oligo_090/SD_oligo_0091 (downstream fragment) primer pairs. These fragments were assembled with BamH1/Nhe1 linearized pNPTS138 vector using Gibson assembly.    | Kanamycin     |
| pNABC591 | 600 bp fragments upstream and downstream of <i>alkB</i> genomic locus were amplified from <i>C. crescentus</i> gDNA using AMJ_oligo_041/AMJ_oligo_053 (upstream fragment) and AMJ_oligo_054/PS_oligo_044 (downstream fragment) primer pairs. These fragments were assembled with BamH1/Nhe1 linearized pNPTS138 vector using Gibson assembly. | Kanamycin     |
| pNABC592 | <i>gam_GFP</i> was amplified using SD_oligo_019 and SD_oligo_020 from an <i>E. coli</i> strain harboring <i>gam-gfp</i> (Shee <i>et al.</i> , 2013) and assembled with Nde1/Nhe1 digested pXYFPC-1 using Gibson assembly.                                                                                                                     | Spectinomycin |

71 **Table S3: Oligos used in present study**

| <b>Primer name</b> | <b>Sequence</b>                                                |
|--------------------|----------------------------------------------------------------|
| AB_oligo_651       | CTGGACCTCTTGCCCATGACCGA                                        |
| AB_oligo_652       | GCTAGCTGCAGCCCGGGG                                             |
| AC_oligo_321       | AACTAGTGGATCCCCGGGCTGCAGCTAGCTTACTTGTACAGCTCGT<br>CCATGCCGA    |
| AC_oligo_322       | GGTCAGGTCGGTCATGGGCAAGAGGTCCAGCACCCGCCCATCACCCA<br>CAGATGC     |
| AMJ_oligo_041      | CAAGCTTCTCTGCAGGATATCTGTGCGGCCAATCAGGCGCTTGATCG                |
| AMJ_oligo_044      | CGGAGACGCGTCACGGCCGAAGAGCCGGCGGATCGCAACCTCC                    |
| AMJ_oligo_053      | AGAGTCAGATTGATCCGGCCTACGTCAAAGCCGGGGACAACGGT                   |
| AMJ_oligo_054      | TTGTCCCCGGCTTTGACGTAGGCCGATCAATCTGACTCTGCGACG                  |
| AMJ_oligo_057      | GCCTGCTGAGCCGCCTTAGTTTTCCGGAACGTTGGAC                          |
| AMJ_oligo_058      | GTCCAACGTTCCGGAAAATAAGGCGGCTCAGCAGGC                           |
| AMJ_oligo_061      | TAGGGGGCGCTCTGGCCTCACATCAAGCGGACTTTCACGGG                      |
| AMJ_oligo_062      | CCCGTGAAAGTCCGCTTGATGTGAGGCCAGAGCGCCCCCTA                      |
| PS_oligo_037       | CAAGCTTCTCTGCAGGATATCTGCTTGGCGATGGCGTCACCT                     |
| PS_oligo_042       | CGGAGACGCGTCACGGCCGAAGTCTACGCAGACGTGGATCTTG                    |
| PS_oligo_049       | CAAGCTTCTCTGCAGGATATCTGGTCAAATGCTTCTCCAGCCG                    |
| PS_oligo_054       | CGGAGACGCGTCACGGCCGAAGGAAGGAGACGAGACGATGGA                     |
| SD_oligo_019       | CAGACGCTCGAGTTTTGGGGAGACGACCATATGGCTAAACCAGCAAA<br>ACGTATCAAG  |
| SD_oligo_020       | GAAGTAGTGGATCCCCGGGCTGCAGCTAGCGCAGCCGGATCCCTTA<br>TTTGTATAGTTC |
| SD_oligo_088       | CAAGCTTCTCTGCAGGATATCTGTTTCGCTATCGACCACTATCT                   |
| SD_oligo_089       | TGGGCCCGCGTGTCCCATTCATGACCAGGGCGTCGAAGCC                       |
| SD_oligo_090       | GGCTTCGACGCCCTGGTCATGAATGGGACACGCCGGCCCA                       |
| SD_oligo_091       | CGGAGACGCGTCACGGCCGAAGCAGAAGTTCAAGGACCCGGAGAAA                 |
| RR_oligo_021       | CAAGCTTCTCTGCAGGATATCTGGACGCTGGCGCCGTTGATC                     |
| RR_oligo_022       | ATCGCGCCCCGCTCACATGTTAGGTCCTCCCCCTCGC                          |
| RR_oligo_023       | GGAGGACCTAACATGTGAGCGGGGCGCGATCCT                              |
| RR_oligo_024       | CGGAGACGCGTCACGGCCGAAGGCGACATGCGGGTCAGCA                       |
| UPdel01635_F       | TTCTCTGCAGGATATCTGGATCCACAATCGACGGCGAGACCTGGCTGGC              |
| UPdel01635_R       | TGACGGTCTTAGAGCTCCAGGCTCAAGCGGGGTTCCCCACGCT                    |
| DWNdel01635_F      | CGCTTGAGCCTGGAGCTAAGAACCGTCACAAAGCGGCGCTATC                    |
| DWNdel01635_R      | TCACGGCCGAAGCTAGCGAATTCGCCGGCGTCTGCGGGCCCCGCCCA                |
| UPdel00270_F       | TTCTCTGCAGGATATCTGGATCCATCGAGGGGAGGGGAAGTTGAAGTTG              |
| UPdel00270_R       | GGGAATTTGTCAAGCGGCCATCAGGTCCTTCGGATAGGCGGTGCG                  |
| DWNdel00270_F      | AAGGACCTGATGGCCGCTTGACAAATCCCGAGCGTCTTCGGGA                    |
| DWNdel00270_R      | TCACGGCCGAAGCTAGCGAATTCGGGTGGCGCTCTGATCCTCCAGCAGG              |
| UPdel00158_F       | TTCTCTGCAGGATATCTGGATCCCATCCGTCGGGCGGTCTCTCTATCG               |
| UPdel00158_R       | GGTGGACGCGCCGCCATGCGGGCGTCTTAAGCGGTGTCGG                       |
| DWNdel00158_F      | AACGCCCGCATGGCGGGCGCGTCCGACCGTGGGCTCGAGGGCGAG                  |
| DWNdel00158_R      | TCACGGCCGAAGCTAGCGAATTCCTCGCGGGCCCGCGGGACGCCAGG                |

72

73 **References:**

- 74 Badrinarayanan, A., Le, T. B. K., & Laub, M. T. (2015). Rapid pairing and re-segregation of distant  
75 homologous loci enables double-strand break repair in bacteria. *The Journal of Cell Biology*,  
76 *210*(3), 385–400. <https://doi.org/10.1083/jcb.201505019>
- 77 Chimthanawala, A., Parmar, J. J., Kumar, S., Iyer, K. S., Rao, M., & Badrinarayanan, A. (2021). *SMC*  
78 *protein RecN drives RecA filament translocation and remodelling for in vivo homology search*  
79 [Preprint]. *Cell Biology*. <https://doi.org/10.1101/2021.08.16.456443>
- 80 Modell, J. W., Kambara, T. K., Perchuk, B. S., & Laub, M. T. (2014). A DNA damage-induced, SOS-  
81 independent checkpoint regulates cell division in *Caulobacter crescentus*. *PLoS Biology*,  
82 *12*(10), e1001977. <https://doi.org/10.1371/journal.pbio.1001977>
- 83 Skerker, J. M., Prasol, M. S., Perchuk, B. S., Biondi, E. G., & Laub, M. T. (2005). Two-Component Signal  
84 Transduction Pathways Regulating Growth and Cell Cycle Progression in a Bacterium: A  
85 System-Level Analysis. *PLoS Biology*, *3*(10), e334.  
86 <https://doi.org/10.1371/journal.pbio.0030334>
- 87 Thanbichler, M., Iniesta, A. A., & Shapiro, L. (2007). A comprehensive set of plasmids for vanillate-  
88 and xylose-inducible gene expression in *Caulobacter crescentus*. *Nucleic Acids Research*,  
89 *35*(20), e137. <https://doi.org/10.1093/nar/gkm818>
- 90
